# Supplementary material for: Vitrimerization of crosslinked poly(ethylene-vinyl acetate): the effect of catalysts
Source: Royal Society of Chemistry journal article supplement (doi:10.1039/d4lp00112e), 2024-01-01
Supplement: d4lp00112e8.pdf [file d4lp00112e8.pdf]

## Supporting Information

### **Vitrimerization of Crosslinked Poly (Ethylene-Vinyl Acetate): The effect of Catalyst**

Amin Jamei Oskouei<sup>a</sup>, Erqian Mao<sup>b</sup>, Thomas G. Gray<sup>b</sup>, Alireza Bandegi<sup>a</sup>, Sarah Mitchell<sup>c</sup>,  
Michelle K. Sing<sup>c</sup>, Jayme Kennedy<sup>c</sup>, Kimberly Miller McLoughlin<sup>c</sup>, Ica Manas-Zloczower<sup>\*a</sup>

<sup>a</sup> Department of Macromolecular Science and Engineering, Case Western Reserve  
University, 10900 Euclid Avenue, Cleveland, OH 44106, USA

<sup>b</sup> Department of Chemistry, Case Western Reserve University, 10900 Euclid Avenue,  
Cleveland, OH 44106, USA

<sup>c</sup> Braskem America, 550 Technology Drive, Pittsburgh, PA 15219, USA

Keywords: Vitrimerization, Crosslinked Poly (Ethylene- Vinyl Acetate), EVA, Recycling,  
Transesterification, Vitrimer

Table S1. Properties of EVA material selected for vitrimerization.

| Sample | wt% VA<br>( <sup>1</sup> H-NMR) <sup>1</sup> | nominal MFR <sup>a</sup> (190 °C) | Mw <sup>b</sup> (g/mol) <sup>1</sup> | [VA]/ [DCP]<br>(mol/mol) |
|--------|----------------------------------------------|-----------------------------------|--------------------------------------|--------------------------|
| EVA    | 21.8                                         | 2.1                               | 103,591                              | 35 ± 0.03                |

<sup>a</sup> melt flow rate from the datasheet

<sup>b</sup> molecular weight of initial thermoplastic EVAs

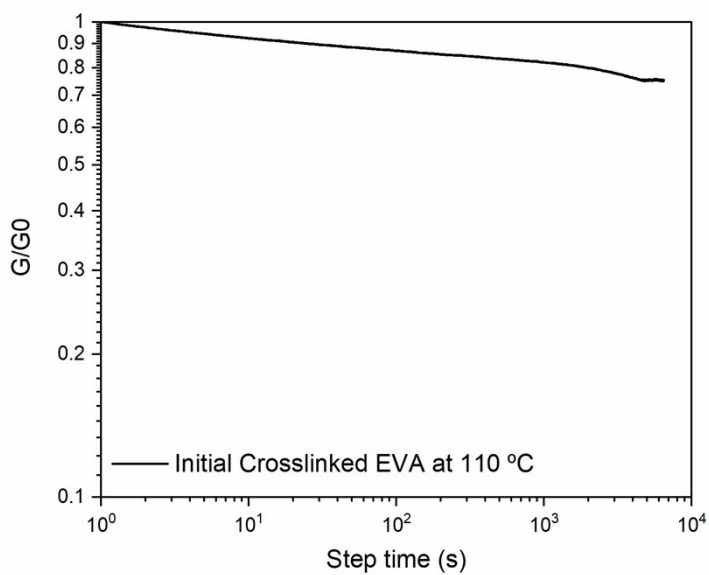

Figure S1. Stress relaxation test of crosslinked EVA at 110°C showing no relaxation, indicative of a highly crosslinked network.

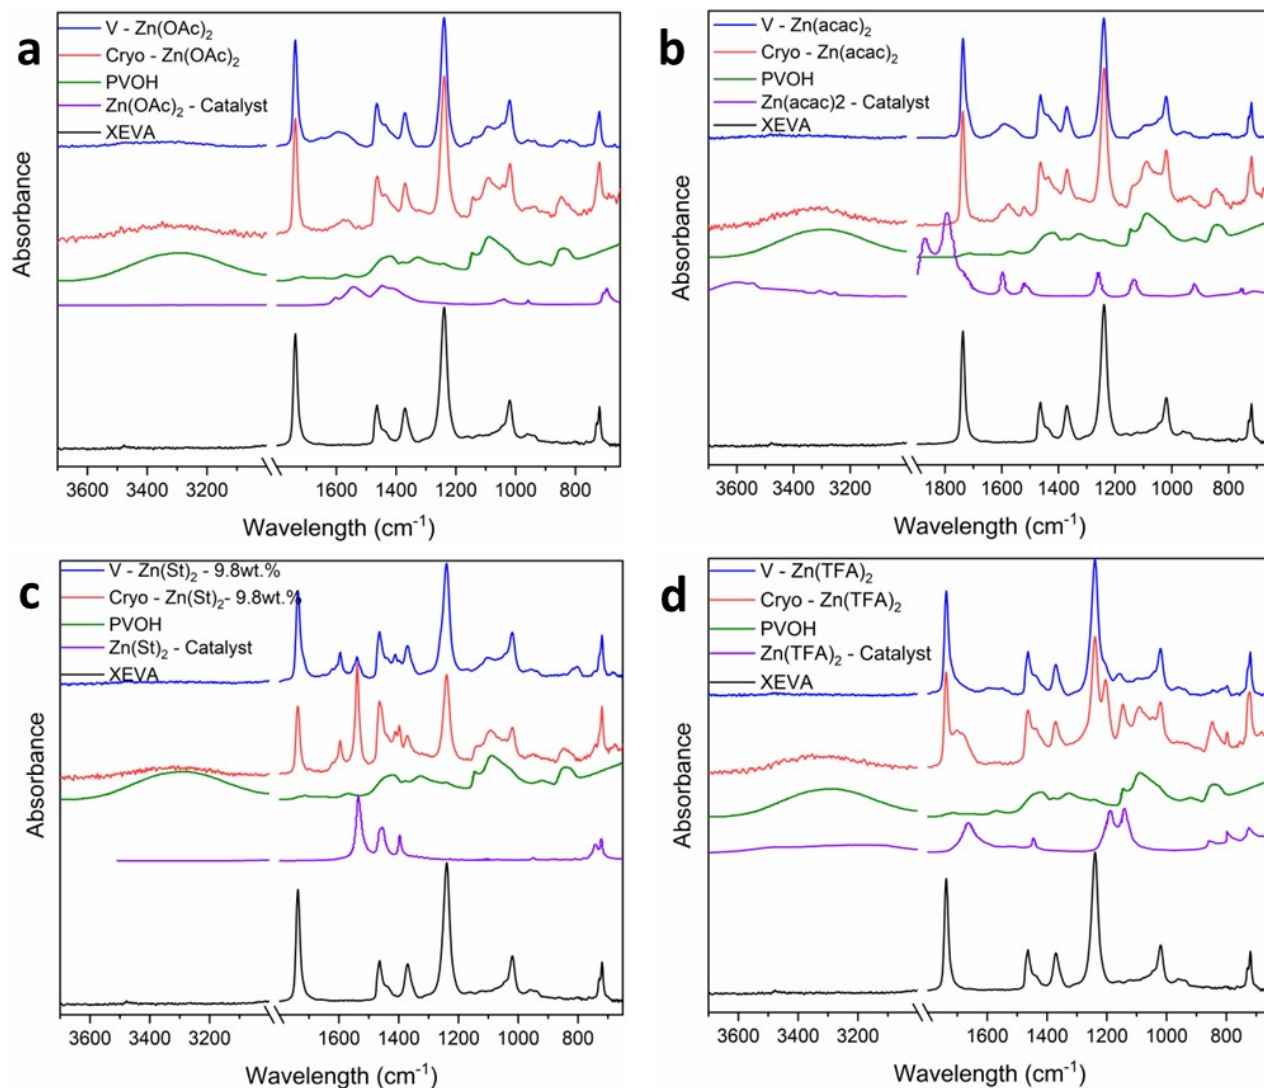

Figure S2. FTIR spectra of initial crosslinked and vitrimerized EVAs along with FTIR spectra of PVOH, zinc salt and cryo-milled samples before compression molding.

Table S2. Cartesian coordinates of optimized geometries in angstrom, alkyl hydrogens are hidden on the figure for clarity.

A1.  $\text{Zn}(\text{OAc})_2$  catalyzed reactant complex

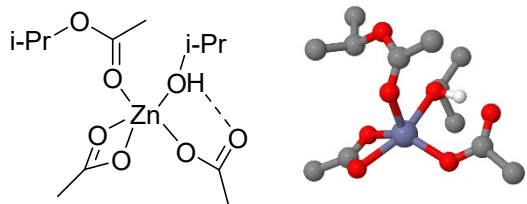

|    |           |          |          |
|----|-----------|----------|----------|
| Zn | -0.409551 | 0.816426 | 0.300812 |
| O  | -2.265752 | 0.826566 | 0.889729 |

|   |           |           |           |
|---|-----------|-----------|-----------|
| C | -3.028427 | -0.192855 | 0.890883  |
| O | -2.745911 | -1.303486 | 0.401675  |
| C | -4.369541 | 0.006872  | 1.543234  |
| O | 0.837998  | 1.725001  | -1.146239 |
| C | 1.026288  | 2.663489  | -0.318787 |
| O | 0.459483  | 2.635299  | 0.803796  |
| C | 1.950682  | 3.790297  | -0.665261 |
| C | 3.689443  | -0.389730 | 0.884655  |
| O | 0.632812  | -0.397123 | 1.632663  |
| C | 2.675282  | -1.081844 | 0.005014  |
| O | 1.906323  | -2.031169 | 0.797848  |
| C | 3.290479  | -1.889001 | -1.109433 |
| C | 0.910560  | -1.583644 | 1.519542  |
| C | 0.131924  | -2.653265 | 2.201751  |
| O | -0.591726 | -0.920846 | -0.870996 |
| C | -0.624188 | -0.906039 | -2.298683 |
| C | -1.733673 | -0.007770 | -2.805956 |
| C | -0.744846 | -2.326837 | -2.808764 |
| H | -4.897084 | 0.817636  | 1.037107  |
| H | -4.224148 | 0.318843  | 2.579090  |
| H | -4.960643 | -0.905220 | 1.504537  |
| H | 2.959565  | 3.516159  | -0.344930 |
| H | 1.663713  | 4.697044  | -0.135918 |
| H | 1.969571  | 3.955463  | -1.741115 |
| H | 4.277637  | 0.303500  | 0.279900  |
| H | 3.199531  | 0.180223  | 1.674190  |
| H | 4.370825  | -1.116224 | 1.333713  |
| H | 0.006816  | -2.387886 | 3.251757  |
| H | 2.518222  | -2.387454 | -1.696879 |
| H | 3.851480  | -1.226726 | -1.771065 |
| H | 1.975731  | -0.353162 | -0.406093 |
| H | -0.863469 | -2.669859 | 1.747960  |
| H | 3.973440  | -2.644526 | -0.714677 |
| H | 0.603598  | -3.627482 | 2.101522  |
| H | 0.338429  | -0.483810 | -2.600098 |
| H | -2.708302 | -0.373908 | -2.472077 |
| H | -1.702509 | -2.761113 | -2.508401 |
| H | -1.734146 | 0.019451  | -3.897913 |
| H | -0.686363 | -2.352136 | -3.899185 |
| H | -1.597195 | 1.012985  | -2.443528 |
| H | 0.055032  | -2.949893 | -2.403861 |
| H | -1.482394 | -1.210092 | -0.477321 |

A2. Zn(OAc)<sub>2</sub> catalyzed transition state

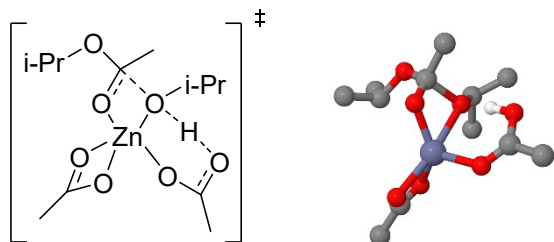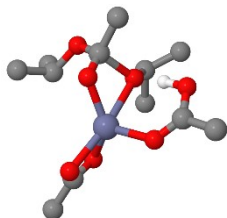

|    |           |           |           |
|----|-----------|-----------|-----------|
| Zn | -0.124839 | 1.030500  | -0.324045 |
| O  | 1.822745  | 0.524877  | -0.362157 |
| O  | 2.715139  | 2.562541  | -0.546817 |
| C  | 2.794622  | 1.291518  | -0.360693 |
| C  | 4.168494  | 0.764717  | -0.113268 |
| H  | 4.889203  | 1.261094  | -0.762031 |
| H  | 4.190016  | -0.313188 | -0.251930 |
| H  | 4.439657  | 0.995290  | 0.920402  |
| O  | -1.283724 | 0.337788  | -1.873336 |
| O  | -1.128282 | -0.771335 | 0.003447  |
| C  | -1.597808 | -0.662012 | -1.156897 |
| C  | -2.546029 | -1.684929 | -1.698975 |
| H  | -2.312291 | -1.896092 | -2.742163 |
| H  | -3.557000 | -1.271018 | -1.666086 |
| H  | -2.516740 | -2.594375 | -1.103234 |
| O  | 0.366449  | 3.185250  | -1.018545 |
| H  | 1.712778  | 2.869584  | -0.742852 |
| O  | -0.432211 | 2.394871  | 1.011501  |
| C  | -0.435281 | 3.561494  | 0.467003  |
| C  | 0.424245  | 4.629614  | 1.086411  |
| H  | 1.442192  | 4.265192  | 1.210069  |
| H  | 0.009725  | 4.858833  | 2.069993  |
| H  | 0.418622  | 5.538244  | 0.485733  |
| O  | -1.612227 | 4.114369  | 0.080254  |
| C  | 0.179137  | 4.011549  | -2.166902 |
| C  | 1.418621  | 4.841880  | -2.447147 |
| C  | -0.206333 | 3.146962  | -3.348966 |
| H  | -0.651566 | 4.683935  | -1.927779 |
| H  | 1.705137  | 5.433438  | -1.575663 |
| H  | 1.230440  | 5.528086  | -3.275856 |
| H  | 2.263951  | 4.205694  | -2.721664 |
| H  | -1.091061 | 2.548648  | -3.129787 |
| H  | 0.605442  | 2.458690  | -3.600372 |
| H  | -0.407352 | 3.768403  | -4.225066 |
| C  | -2.697076 | 3.244216  | -0.279731 |

|   |           |          |           |
|---|-----------|----------|-----------|
| C | -3.467876 | 2.823396 | 0.952984  |
| C | -3.551633 | 4.015251 | -1.259641 |
| H | -2.291376 | 2.361868 | -0.784796 |
| H | -2.823066 | 2.285018 | 1.645555  |
| H | -4.298991 | 2.173376 | 0.669144  |
| H | -3.876722 | 3.702634 | 1.457448  |
| H | -2.985737 | 4.280431 | -2.154075 |
| H | -3.923897 | 4.933425 | -0.799212 |
| H | -4.408100 | 3.410324 | -1.563519 |

### A3. Zn(OAc)<sub>2</sub> catalyzed tetrahedral intermediate

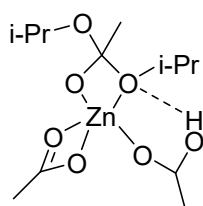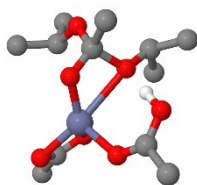

|    |           |           |           |
|----|-----------|-----------|-----------|
| Zn | -0.655032 | 0.889778  | 0.307368  |
| O  | -2.517496 | 0.086732  | 0.318377  |
| C  | -2.849996 | -1.091527 | 0.460507  |
| O  | -2.034032 | -2.093723 | 0.402864  |
| C  | -4.269003 | -1.459845 | 0.733007  |
| O  | -0.281296 | 1.722172  | -1.547487 |
| C  | -0.564551 | 2.847626  | -1.043310 |
| O  | -0.899375 | 2.923552  | 0.170941  |
| C  | -0.470911 | 4.086770  | -1.875635 |
| C  | 2.972417  | 1.610121  | 1.163207  |
| O  | 0.381463  | -0.004344 | 1.608573  |
| C  | 2.671390  | 0.542120  | 0.131127  |
| O  | 2.408279  | -0.710987 | 0.764543  |
| C  | 3.837098  | 0.316052  | -0.807080 |
| C  | 1.100745  | -1.002662 | 1.127219  |
| C  | 1.170220  | -2.205518 | 2.042579  |
| O  | 0.349017  | -1.398589 | -0.143180 |
| C  | 0.993604  | -2.208211 | -1.138803 |
| C  | 0.793745  | -1.538532 | -2.481147 |
| C  | 0.449417  | -3.623399 | -1.116367 |
| H  | -4.920855 | -0.611056 | 0.544662  |
| H  | -4.351421 | -1.752524 | 1.782883  |

|   |           |           |           |
|---|-----------|-----------|-----------|
| H | -4.559105 | -2.319710 | 0.129612  |
| H | 0.541761  | 4.487097  | -1.778268 |
| H | -1.168507 | 4.841390  | -1.517032 |
| H | -0.646524 | 3.857766  | -2.925116 |
| H | 3.173302  | 2.565637  | 0.671918  |
| H | 2.133185  | 1.733009  | 1.845820  |
| H | 3.855789  | 1.328734  | 1.742312  |
| H | 1.629727  | -1.890688 | 2.979246  |
| H | 3.594315  | -0.428276 | -1.567520 |
| H | 4.103155  | 1.247554  | -1.311007 |
| H | 1.800334  | 0.837731  | -0.465155 |
| H | 0.164926  | -2.572924 | 2.247105  |
| H | 4.707911  | -0.034173 | -0.247662 |
| H | 1.775985  | -3.000177 | 1.606238  |
| H | 2.056954  | -2.218688 | -0.888138 |
| H | -0.268778 | -1.501494 | -2.735906 |
| H | -0.610686 | -3.640636 | -1.381737 |
| H | 1.312328  | -2.095175 | -3.265155 |
| H | 0.986723  | -4.239228 | -1.840972 |
| H | 1.167054  | -0.514156 | -2.468967 |
| H | 0.564649  | -4.079546 | -0.132092 |
| H | -1.064438 | -1.805249 | 0.205160  |

B1. Zn(acac)<sub>2</sub> catalyzed attacking complex

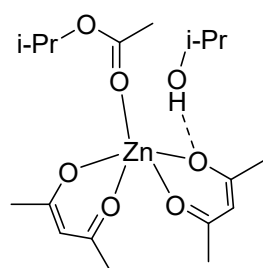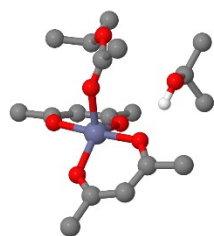

|   |           |           |           |
|---|-----------|-----------|-----------|
| C | -1.962831 | 0.361620  | 2.929349  |
| H | -2.299913 | -0.672661 | 2.819465  |
| H | -2.812163 | 0.993020  | 3.186241  |
| H | -1.236486 | 0.373797  | 3.744971  |
| C | -1.283440 | 0.788844  | 1.660233  |
| C | -1.809653 | 1.861912  | 0.936766  |
| H | -2.679783 | 2.358867  | 1.342746  |
| C | -1.280235 | 2.360395  | -0.266329 |
| C | -1.944076 | 3.546708  | -0.907118 |
| H | -2.182958 | 3.306935  | -1.945440 |

|    |           |           |           |
|----|-----------|-----------|-----------|
| H  | -1.233283 | 4.376558  | -0.926895 |
| H  | -2.846988 | 3.859610  | -0.384349 |
| O  | -0.267227 | 0.107850  | 1.336655  |
| O  | -0.281398 | 1.900002  | -0.874517 |
| C  | 4.793705  | 2.150147  | -0.670036 |
| H  | 4.628221  | 3.018671  | -0.028242 |
| H  | 5.809714  | 1.783739  | -0.530805 |
| H  | 4.663902  | 2.485656  | -1.701542 |
| C  | 3.753636  | 1.111856  | -0.361204 |
| C  | 4.174141  | -0.157611 | 0.061696  |
| H  | 5.238268  | -0.329166 | 0.142609  |
| C  | 3.325262  | -1.214130 | 0.392458  |
| C  | 3.915966  | -2.517549 | 0.843698  |
| H  | 3.597131  | -2.714952 | 1.870620  |
| H  | 3.518964  | -3.328680 | 0.228892  |
| H  | 5.003751  | -2.520792 | 0.798356  |
| O  | 2.558459  | 1.482997  | -0.512442 |
| O  | 2.060064  | -1.167790 | 0.354141  |
| Zn | 0.915133  | 0.409723  | -0.244716 |
| H  | 1.042085  | -2.612856 | 0.413514  |
| H  | -0.687734 | -3.199816 | 3.461914  |
| H  | 0.745424  | -4.071573 | 2.881668  |
| H  | -2.195590 | -4.608159 | 1.876976  |
| C  | 0.083393  | -3.223178 | 2.686910  |
| H  | -0.756842 | -5.486576 | 1.324636  |
| C  | -1.373078 | -4.599209 | 1.157912  |
| H  | 0.659992  | -2.298150 | 2.756554  |
| C  | -0.536348 | -3.348863 | 1.308057  |
| H  | -1.790304 | -4.659728 | 0.150246  |
| H  | -1.179103 | -2.469386 | 1.148538  |
| O  | 0.456793  | -3.387210 | 0.303475  |
| H  | -3.219628 | -2.493794 | -0.113502 |
| C  | -3.539619 | -1.712624 | -0.804019 |
| H  | -4.145994 | -0.990970 | -0.253307 |
| H  | -1.732945 | -0.575636 | -0.621753 |
| C  | -2.351284 | -1.008021 | -1.408110 |
| C  | -0.275153 | -1.837853 | -2.224337 |
| O  | -1.567076 | -2.033230 | -2.070094 |
| H  | -0.248193 | -3.468502 | -3.609913 |
| H  | -4.160050 | -2.165831 | -1.580476 |
| C  | 0.404908  | -2.985485 | -2.884965 |
| H  | 0.637618  | -3.699817 | -2.090073 |
| O  | 0.309386  | -0.831490 | -1.864839 |



|   |           |           |           |
|---|-----------|-----------|-----------|
| C | -2.730646 | 0.054252  | -2.412648 |
| H | -3.353838 | 0.806677  | -1.925423 |
| H | 1.329191  | -2.648086 | -3.348293 |
| H | -1.844305 | 0.551850  | -2.806371 |
| H | -3.299171 | -0.385151 | -3.235741 |

B2. Zn(acac)<sub>2</sub> catalyzed transition state

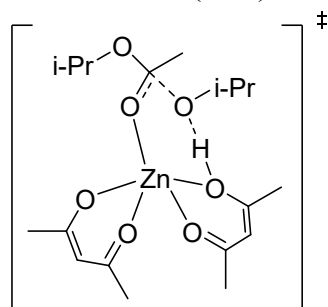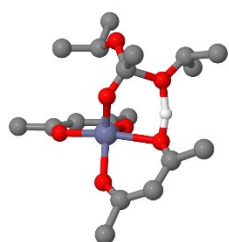

|   |           |          |           |
|---|-----------|----------|-----------|
| C | -2.015913 | 1.028935 | 2.984438  |
| H | -2.462243 | 0.031074 | 2.968011  |
| H | -2.789352 | 1.765470 | 3.197036  |
| H | -1.274618 | 1.034022 | 3.786650  |
| C | -1.322548 | 1.275298 | 1.675049  |
| C | -1.754422 | 2.334891 | 0.873842  |
| H | -2.574076 | 2.933101 | 1.246836  |
| C | -1.201680 | 2.705463 | -0.364463 |
| C | -1.787991 | 3.883955 | -1.088462 |
| H | -2.163876 | 3.547791 | -2.058064 |
| H | -0.995731 | 4.609324 | -1.286229 |
| H | -2.593014 | 4.364012 | -0.533878 |
| O | -0.386303 | 0.467104 | 1.403922  |
| O | -0.244643 | 2.133210 | -0.945478 |
| C | 4.771612  | 1.836420 | -0.443930 |
| H | 4.478175  | 2.848018 | -0.167466 |
| H | 5.694032  | 1.552243 | 0.062694  |
| H | 4.959539  | 1.824390 | -1.522309 |
| C | 3.645807  | 0.887751 | -0.148932 |

|    |           |           |           |
|----|-----------|-----------|-----------|
| C  | 3.988226  | -0.473341 | 0.106569  |
| H  | 5.027955  | -0.749619 | -0.003222 |
| C  | 3.099262  | -1.462503 | 0.424015  |
| C  | 3.512890  | -2.892431 | 0.500060  |
| H  | 3.313921  | -3.282739 | 1.501621  |
| H  | 2.911065  | -3.478692 | -0.199883 |
| H  | 4.566774  | -3.022903 | 0.262907  |
| O  | 2.492913  | 1.350112  | -0.196651 |
| O  | 1.854465  | -1.201312 | 0.700722  |
| Zn | 0.662516  | 0.484818  | -0.278117 |
| H  | 1.119533  | -1.956681 | 0.403440  |
| H  | -1.728809 | -3.918232 | 2.249263  |
| H  | -0.223919 | -3.003183 | 2.436573  |
| H  | -0.436400 | -5.738052 | 0.894660  |
| C  | -1.082095 | -3.172681 | 1.780444  |
| H  | 1.043885  | -4.806576 | 1.143826  |
| C  | 0.176369  | -4.929098 | 0.489646  |
| H  | -1.625742 | -2.230985 | 1.698955  |
| C  | -0.624865 | -3.643055 | 0.413718  |
| H  | 0.528146  | -5.229388 | -0.498836 |
| H  | -1.498241 | -3.795046 | -0.226226 |
| O  | 0.144531  | -2.613910 | -0.190896 |
| H  | -3.467670 | -2.294933 | 0.127480  |
| C  | -3.650334 | -1.564316 | -0.662487 |
| H  | -4.278610 | -0.768201 | -0.256781 |
| H  | -1.805081 | -0.535199 | -0.356810 |
| C  | -2.353852 | -0.986664 | -1.187509 |
| C  | -0.212759 | -2.015180 | -1.616430 |
| O  | -1.593919 | -2.076218 | -1.710977 |
| H  | -0.148486 | -3.987176 | -2.506125 |
| H  | -4.199091 | -2.059172 | -1.467665 |
| C  | 0.337552  | -3.016468 | -2.609332 |
| H  | 1.411889  | -3.119912 | -2.460872 |
| O  | 0.349784  | -0.848273 | -1.653463 |
| C  | -2.591461 | 0.047946  | -2.267944 |
| H  | -3.191532 | 0.872423  | -1.874460 |
| H  | 0.152689  | -2.635968 | -3.614390 |
| H  | -1.645014 | 0.446038  | -2.630402 |
| H  | -3.131516 | -0.405955 | -3.103136 |

B3. Zn(acac)<sub>2</sub> catalyzed tetrahedral intermediate

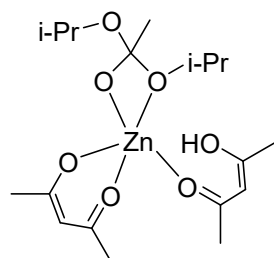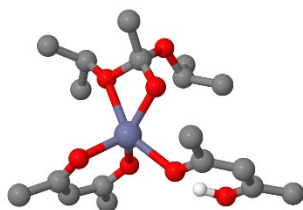

|    |           |           |           |
|----|-----------|-----------|-----------|
| C  | -3.324963 | -3.512911 | 0.693381  |
| H  | -2.784467 | -4.272077 | 1.263608  |
| H  | -3.927908 | -3.995982 | -0.073806 |
| H  | -3.978463 | -2.990235 | 1.395929  |
| C  | -2.337663 | -2.534280 | 0.126937  |
| C  | -2.297642 | -2.349874 | -1.261838 |
| H  | -2.995335 | -2.930001 | -1.849505 |
| C  | -1.425378 | -1.508807 | -1.966548 |
| C  | -1.524268 | -1.459324 | -3.463219 |
| H  | -2.239435 | -2.176053 | -3.863727 |
| H  | -0.537330 | -1.643425 | -3.892974 |
| H  | -1.820604 | -0.449783 | -3.760529 |
| O  | -1.611208 | -1.950498 | 0.981622  |
| O  | -0.542988 | -0.760453 | -1.459179 |
| C  | 2.292034  | -1.270980 | 2.632268  |
| H  | 1.746683  | -0.339176 | 2.821925  |
| H  | 1.644817  | -2.097101 | 2.932964  |
| H  | 3.216405  | -1.285759 | 3.207270  |
| C  | 2.534033  | -1.335069 | 1.166295  |
| C  | 3.834293  | -1.138046 | 0.637320  |
| H  | 4.669051  | -0.988715 | 1.305586  |
| C  | 4.038533  | -1.070126 | -0.719074 |
| C  | 5.359448  | -0.793259 | -1.333286 |
| H  | 5.300439  | 0.134607  | -1.908194 |
| H  | 6.140061  | -0.703000 | -0.580924 |
| H  | 5.613578  | -1.592084 | -2.033960 |
| O  | 1.558958  | -1.534518 | 0.393221  |
| O  | 3.067846  | -1.229667 | -1.579154 |
| Zn | -0.348473 | -0.538893 | 0.497480  |
| O  | 0.399137  | 0.905461  | 1.503139  |
| C  | -0.438380 | 1.936648  | 1.364324  |
| O  | 0.043652  | 2.981893  | 0.557461  |
| C  | 0.680926  | 2.612028  | -0.660084 |
| C  | 2.177928  | 2.463024  | -0.461500 |
| H  | 0.267378  | 1.660676  | -1.013061 |
| C  | 0.353536  | 3.689668  | -1.672169 |

|   |           |           |           |
|---|-----------|-----------|-----------|
| O | -1.603538 | 1.332580  | 0.712471  |
| C | -2.680511 | 2.142640  | 0.258890  |
| C | -3.021805 | 1.721595  | -1.156076 |
| C | -3.869184 | 1.993139  | 1.188998  |
| H | -2.333875 | 3.181476  | 0.251875  |
| C | -0.830182 | 2.582549  | 2.677671  |
| H | 0.074956  | 2.946108  | 3.163873  |
| H | -1.504105 | 3.426901  | 2.525091  |
| H | -1.307000 | 1.837890  | 3.314346  |
| H | 2.236235  | -1.389684 | -1.035928 |
| H | -4.192964 | 0.949396  | 1.214157  |
| H | -4.706785 | 2.605374  | 0.845191  |
| H | -3.616759 | 2.296528  | 2.205459  |
| H | -3.346998 | 0.677520  | -1.170097 |
| H | -2.152508 | 1.815911  | -1.808239 |
| H | -3.830323 | 2.337714  | -1.556465 |
| H | 2.610223  | 3.414884  | -0.140785 |
| H | 2.657348  | 2.162669  | -1.397720 |
| H | 2.381564  | 1.713049  | 0.301068  |
| H | 0.823838  | 3.468799  | -2.633301 |
| H | 0.720938  | 4.658051  | -1.322989 |
| H | -0.724422 | 3.769616  | -1.824042 |

C1. Zn(TFA)<sub>2</sub> catalyzed reactant complex

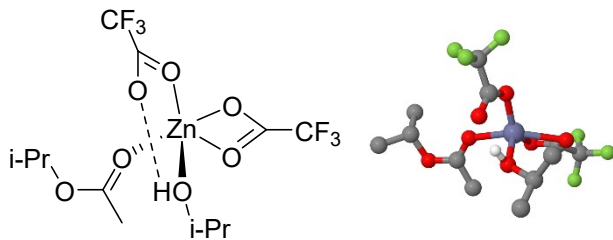

|   |           |           |           |
|---|-----------|-----------|-----------|
| O | -1.998390 | -1.773058 | 0.413950  |
| O | -2.238466 | 0.089532  | -0.739541 |
| C | -2.676646 | -0.994098 | -0.255603 |
| C | -4.164169 | -1.293281 | -0.527750 |
| F | -4.423350 | -1.251635 | -1.833572 |
| F | -4.523322 | -2.483052 | -0.069338 |
| F | -4.922783 | -0.369673 | 0.075333  |
| O | 1.234723  | -0.988935 | -0.631694 |
| O | 2.457351  | -0.236972 | 1.099725  |
| C | 2.304283  | -0.778111 | 0.007220  |
| C | 3.572808  | -1.245343 | -0.749149 |
| F | 3.396153  | -2.433289 | -1.321045 |

|    |           |           |           |
|----|-----------|-----------|-----------|
| F  | 3.856141  | -0.359192 | -1.715308 |
| F  | 4.627135  | -1.324712 | 0.052648  |
| Zn | -0.391219 | -0.131664 | 0.016561  |
| O  | 0.038359  | 0.156701  | 1.990535  |
| C  | -0.202968 | 2.868372  | -0.102796 |
| C  | -1.466472 | 3.020761  | 0.668039  |
| H  | -1.739061 | 4.065823  | 0.788051  |
| H  | -2.257560 | 2.466566  | 0.159502  |
| H  | -1.319161 | 2.557236  | 1.646854  |
| O  | 0.396581  | 3.996131  | -0.382545 |
| C  | 1.663405  | 3.940953  | -1.107089 |
| C  | 1.384302  | 3.809939  | -2.585237 |
| C  | 2.399261  | 5.203679  | -0.738728 |
| H  | 2.197889  | 3.060426  | -0.745653 |
| O  | 0.259705  | 1.786811  | -0.443901 |
| H  | 1.027890  | 0.073395  | 1.882017  |
| C  | -0.420129 | -0.702213 | 3.057170  |
| C  | 0.194130  | -2.079044 | 2.939280  |
| C  | -0.122201 | -0.032553 | 4.379720  |
| H  | -1.500219 | -0.774866 | 2.910482  |
| H  | 0.956903  | 0.062260  | 4.528261  |
| H  | -0.526668 | -0.624320 | 5.203512  |
| H  | -0.566378 | 0.963558  | 4.420371  |
| H  | -0.053318 | -2.534129 | 1.979589  |
| H  | -0.191230 | -2.726870 | 3.729088  |
| H  | 1.281393  | -2.027634 | 3.041508  |
| H  | 3.375593  | 5.210840  | -1.226252 |
| H  | 2.553974  | 5.266918  | 0.339236  |
| H  | 1.844477  | 6.085598  | -1.065816 |
| H  | 2.328776  | 3.780909  | -3.131792 |
| H  | 0.805827  | 4.664446  | -2.943426 |
| H  | 0.840371  | 2.890992  | -2.803887 |

C2. Zn(TFA)<sub>2</sub> catalyzed transition state 1 (proton transfer)

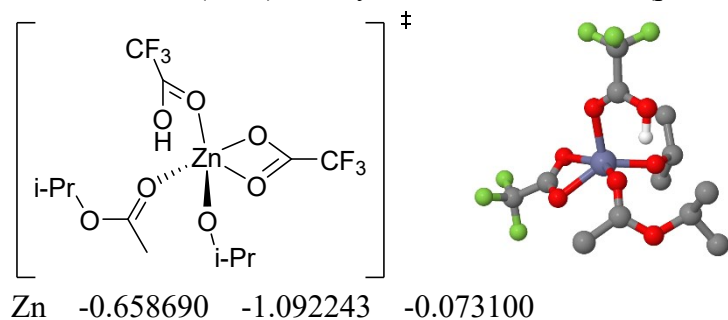

|   |           |           |           |
|---|-----------|-----------|-----------|
| O | -1.878339 | -2.836807 | 0.382064  |
| O | -2.589760 | -1.089885 | -0.744696 |
| C | -2.766329 | -2.223637 | -0.225493 |
| C | -4.172401 | -2.835900 | -0.366728 |
| F | -4.514588 | -2.912989 | -1.653562 |
| F | -4.240044 | -4.050753 | 0.155380  |
| F | -5.066649 | -2.062745 | 0.254568  |
| O | 0.738642  | -2.093670 | -1.320991 |
| O | 2.216865  | -0.399914 | -1.390373 |
| C | 1.834511  | -1.623509 | -1.544534 |
| C | 2.977297  | -2.516869 | -2.074271 |
| F | 3.982972  | -2.521421 | -1.202737 |
| F | 2.558153  | -3.754717 | -2.250656 |
| F | 3.424660  | -2.043461 | -3.234878 |
| C | 1.587646  | -1.938182 | 2.222984  |
| H | 0.963605  | -2.723459 | 1.781033  |
| H | 1.919808  | -2.290392 | 3.203257  |
| H | 2.470861  | -1.801091 | 1.594150  |
| C | 0.804185  | -0.639403 | 2.329045  |
| H | 1.460767  | 0.113260  | 2.795049  |
| O | 0.454151  | -0.147832 | 1.064789  |
| H | 1.451419  | 0.153840  | -1.088238 |
| C | -0.418704 | -0.804500 | 3.215851  |
| H | -0.976006 | 0.133378  | 3.268301  |
| H | -0.144394 | -1.101786 | 4.231712  |
| H | -1.080237 | -1.577532 | 2.808394  |
| C | -2.183092 | 1.830689  | -2.216552 |
| H | -1.990411 | 1.675380  | -3.279894 |
| H | -2.818105 | 1.008781  | -1.880307 |
| H | -2.672342 | 2.788451  | -2.060152 |
| C | -0.888869 | 1.747803  | -1.485218 |
| O | -0.195756 | 0.734686  | -1.495210 |
| O | -0.569239 | 2.840703  | -0.845935 |
| C | 0.649408  | 2.855298  | -0.036905 |
| H | 0.764200  | 1.852056  | 0.384147  |
| C | 1.815170  | 3.229770  | -0.921595 |
| H | 2.733684  | 3.233899  | -0.331590 |
| H | 1.675094  | 4.226822  | -1.345795 |
| H | 1.945858  | 2.519935  | -1.740125 |
| C | 0.391656  | 3.848863  | 1.066740  |
| H | 1.263381  | 3.895351  | 1.722027  |
| H | -0.468096 | 3.546033  | 1.665822  |
| H | 0.208058  | 4.847697  | 0.664219  |

C3. Zn(TFA)<sub>2</sub> catalyzed attacking complex

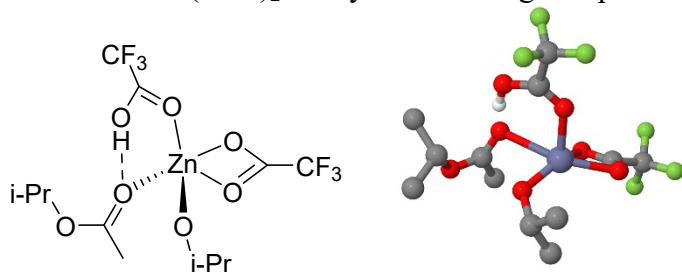

|    |           |           |           |
|----|-----------|-----------|-----------|
| Zn | -0.639028 | -1.264188 | -0.047873 |
| O  | -1.642921 | -3.085790 | 0.446788  |
| O  | -2.408092 | -1.654182 | -1.035003 |
| C  | -2.497290 | -2.720798 | -0.379637 |
| C  | -3.746583 | -3.588098 | -0.622525 |
| F  | -3.867815 | -3.873975 | -1.918604 |
| F  | -3.700719 | -4.727295 | 0.052223  |
| F  | -4.838691 | -2.920317 | -0.240219 |
| O  | 0.927229  | -2.057586 | -1.160740 |
| O  | 1.868363  | -0.273228 | -2.152096 |
| C  | 1.815748  | -1.498856 | -1.776919 |
| C  | 3.075788  | -2.291295 | -2.192481 |
| F  | 2.980734  | -3.554545 | -1.825450 |
| F  | 3.235005  | -2.235877 | -3.511662 |
| F  | 4.148650  | -1.754377 | -1.613308 |
| C  | 0.954619  | -1.293138 | 2.797478  |
| H  | 0.524662  | -2.229033 | 2.421204  |
| H  | 1.086455  | -1.399839 | 3.877614  |
| H  | 1.937868  | -1.158247 | 2.341152  |
| C  | 0.048213  | -0.122957 | 2.452094  |
| H  | 0.495837  | 0.788729  | 2.881434  |
| O  | -0.028219 | 0.072924  | 1.068423  |
| H  | 1.008930  | 0.231843  | -1.899627 |
| C  | -1.332027 | -0.296539 | 3.065054  |
| H  | -1.972354 | 0.549640  | 2.805062  |
| H  | -1.284941 | -0.368589 | 4.155061  |
| H  | -1.800148 | -1.213373 | 2.689169  |
| C  | -2.331430 | 1.787728  | -0.788010 |
| H  | -2.676531 | 2.809624  | -0.941679 |
| H  | -2.854163 | 1.085988  | -1.432688 |
| H  | -2.518537 | 1.522003  | 0.255770  |
| C  | -0.863849 | 1.691702  | -1.005372 |
| O  | -0.355607 | 0.738540  | -1.596966 |

|   |           |          |           |
|---|-----------|----------|-----------|
| O | -0.201301 | 2.701495 | -0.520496 |
| C | 1.250125  | 2.632974 | -0.441322 |
| H | 1.499392  | 1.588104 | -0.251719 |
| C | 1.849219  | 3.136177 | -1.733249 |
| H | 2.937481  | 3.068795 | -1.682387 |
| H | 1.576470  | 4.180797 | -1.898710 |
| H | 1.516473  | 2.550431 | -2.591002 |
| C | 1.629273  | 3.458163 | 0.761737  |
| H | 2.711817  | 3.428366 | 0.898297  |
| H | 1.156151  | 3.058883 | 1.659215  |
| H | 1.325743  | 4.499213 | 0.631964  |

C4. Zn(TFA)<sub>2</sub> catalyzed transition state 2 (nucleophilic attack)

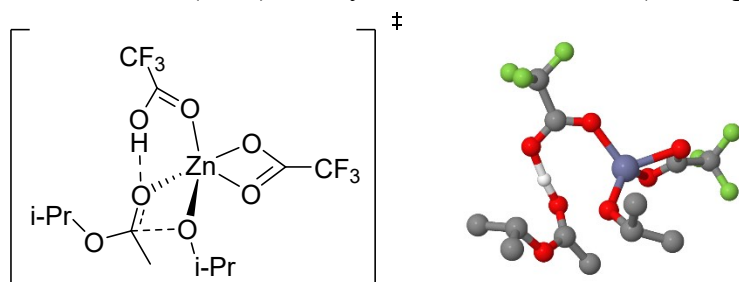

|    |           |           |           |
|----|-----------|-----------|-----------|
| Zn | -0.594362 | -1.548969 | -0.245752 |
| O  | -1.567559 | -3.285870 | 0.357146  |
| O  | -2.447828 | -1.947723 | -1.149774 |
| C  | -2.486241 | -2.967661 | -0.429457 |
| C  | -3.752135 | -3.843563 | -0.469463 |
| F  | -4.315931 | -3.829712 | -1.671333 |
| F  | -3.488999 | -5.102463 | -0.144791 |
| F  | -4.636845 | -3.360853 | 0.411762  |
| O  | 0.959441  | -2.083338 | -1.355831 |
| O  | 1.761106  | -0.157545 | -2.194830 |
| C  | 1.792019  | -1.382538 | -1.951725 |
| C  | 3.074073  | -2.096039 | -2.447118 |
| F  | 4.104889  | -1.706113 | -1.689442 |
| F  | 2.972130  | -3.412240 | -2.366177 |
| F  | 3.337769  | -1.768369 | -3.708344 |
| C  | 0.707430  | -0.540415 | 2.844961  |
| H  | 0.701201  | -1.619111 | 2.656578  |
| H  | 0.658995  | -0.388453 | 3.926237  |



|   |           |           |           |
|---|-----------|-----------|-----------|
| H | 1.654167  | -0.136962 | 2.479279  |
| C | -0.462308 | 0.120853  | 2.136994  |
| H | -0.436738 | 1.198920  | 2.368696  |
| O | -0.319778 | 0.006861  | 0.747452  |
| H | 0.691827  | 0.456201  | -1.859860 |
| C | -1.790896 | -0.437303 | 2.617804  |
| H | -2.623706 | 0.034372  | 2.091930  |
| H | -1.926344 | -0.272717 | 3.689669  |
| H | -1.838989 | -1.516048 | 2.436261  |
| C | -2.109233 | 1.824981  | -0.432295 |
| H | -2.461083 | 2.610331  | -1.108346 |
| H | -2.662262 | 0.911645  | -0.637436 |
| H | -2.260568 | 2.153442  | 0.592943  |
| C | -0.666092 | 1.606528  | -0.699800 |
| O | -0.346476 | 0.857049  | -1.665232 |
| O | 0.116504  | 2.474826  | -0.138253 |
| C | 1.562399  | 2.390178  | -0.289389 |
| H | 1.817775  | 1.331214  | -0.326319 |
| C | 1.982832  | 3.101536  | -1.553470 |
| H | 3.066153  | 3.030385  | -1.664295 |
| H | 1.708261  | 4.157466  | -1.504244 |
| H | 1.529106  | 2.659519  | -2.440395 |
| C | 2.135868  | 3.004064  | 0.962343  |
| H | 3.225460  | 2.954302  | 0.926210  |
| H | 1.794223  | 2.467487  | 1.848008  |
| H | 1.840744  | 4.051842  | 1.049101  |

C5. Zn(TFA)<sub>2</sub> catalyzed tetrahedral intermediate

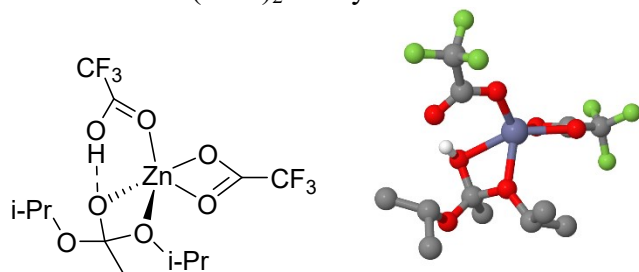

|   |           |           |           |
|---|-----------|-----------|-----------|
| O | -2.514656 | 0.670731  | 0.893754  |
| O | -1.461798 | -0.987082 | -0.195757 |
| C | -2.473449 | -0.376768 | 0.257059  |
| C | -3.809194 | -1.080275 | -0.089965 |
| F | -3.787866 | -2.353375 | 0.299399  |
| F | -4.842625 | -0.484992 | 0.488167  |
| F | -3.999872 | -1.051630 | -1.412836 |

|    |           |           |           |
|----|-----------|-----------|-----------|
| O  | 2.019207  | -1.160265 | 0.740930  |
| O  | 1.615218  | -1.340342 | -1.411897 |
| C  | 2.324461  | -1.552591 | -0.412105 |
| C  | 3.676371  | -2.266208 | -0.594306 |
| F  | 3.667321  | -3.070289 | -1.648023 |
| F  | 4.622466  | -1.336438 | -0.786252 |
| F  | 4.004788  | -2.976825 | 0.476070  |
| Zn | 0.330836  | -0.305773 | -0.035032 |
| O  | 0.610251  | 1.650051  | -0.641564 |
| C  | 0.592355  | 2.297485  | 0.667120  |
| C  | 1.980120  | 2.489817  | 1.220559  |
| H  | 2.509779  | 1.537931  | 1.244817  |
| H  | 2.529518  | 3.210280  | 0.616644  |
| H  | 1.892201  | 2.877057  | 2.234482  |
| O  | -0.011111 | 3.512347  | 0.609097  |
| C  | -1.404480 | 3.608166  | 0.244858  |
| H  | -1.708636 | 2.677163  | -0.240846 |
| C  | -2.229533 | 3.836813  | 1.492094  |
| C  | -1.526448 | 4.751953  | -0.735651 |
| O  | -0.054602 | 1.318420  | 1.423879  |
| C  | 1.181056  | 2.326109  | -1.785134 |
| C  | 0.251213  | 2.074825  | -2.949427 |
| H  | 1.185105  | 3.389505  | -1.530026 |
| C  | 2.586708  | 1.839250  | -2.059962 |
| H  | -1.043504 | 1.271242  | 1.255050  |
| H  | 3.008896  | 2.403417  | -2.894276 |
| H  | 2.578865  | 0.782675  | -2.332629 |
| H  | 3.240966  | 1.973249  | -1.198765 |
| H  | 0.613663  | 2.594344  | -3.838319 |
| H  | -0.758962 | 2.423931  | -2.731527 |
| H  | 0.209968  | 1.006660  | -3.176828 |
| H  | -3.288038 | 3.898231  | 1.232928  |
| H  | -1.930551 | 4.772511  | 1.969916  |
| H  | -2.110173 | 3.026548  | 2.210634  |
| H  | -0.943401 | 4.568237  | -1.639202 |
| H  | -1.171927 | 5.678525  | -0.278815 |
| H  | -2.570612 | 4.888311  | -1.023191 |

D1. Zinc hexanoate catalyzed attacking complex

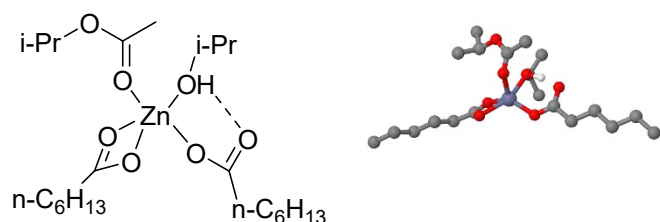

|    |           |           |           |
|----|-----------|-----------|-----------|
| Zn | -0.746923 | 1.070176  | 0.395141  |
| C  | 3.301678  | 0.606760  | 1.048430  |
| O  | 0.340191  | -0.022139 | 1.805603  |
| C  | 2.492655  | -0.335515 | 0.188472  |
| O  | 1.918237  | -1.391727 | 1.008841  |
| C  | 3.305893  | -1.041770 | -0.866211 |
| C  | 0.852714  | -1.128364 | 1.724010  |
| C  | 0.305063  | -2.310738 | 2.444879  |
| O  | -0.714564 | -0.726931 | -0.705453 |
| C  | -0.773493 | -0.768773 | -2.132175 |
| C  | -2.015927 | -0.070241 | -2.645343 |
| C  | -0.681179 | -2.208841 | -2.591518 |
| H  | 4.103485  | 0.068942  | 1.559892  |
| H  | 3.753807  | 1.372030  | 0.413998  |
| H  | 2.673225  | 1.107167  | 1.784817  |
| H  | -0.678763 | -2.523356 | 2.017280  |
| H  | 4.123524  | -1.608173 | -0.414880 |
| H  | 2.681033  | -1.726444 | -1.441423 |
| H  | 1.667169  | 0.199186  | -0.282856 |
| H  | 0.950166  | -3.180688 | 2.352368  |
| H  | 3.730787  | -0.306067 | -1.551194 |
| H  | 0.154435  | -2.049512 | 3.492685  |
| H  | 0.107449  | -0.215147 | -2.468805 |
| H  | -2.036042 | -0.082053 | -3.737356 |
| H  | -0.639140 | -2.264833 | -3.681592 |
| H  | -2.033763 | 0.971008  | -2.318382 |
| H  | 0.213157  | -2.685187 | -2.184983 |
| H  | -2.917146 | -0.570641 | -2.280821 |
| H  | -1.554326 | -2.774558 | -2.254515 |
| H  | -1.563021 | -1.091605 | -0.285387 |
| H  | -6.600457 | -0.837438 | 3.403167  |
| H  | -8.775825 | -2.005402 | 4.131494  |
| H  | -6.929994 | -3.280183 | 2.992067  |
| H  | -4.442936 | 0.325942  | 2.682598  |
| H  | -4.776082 | -2.137176 | 2.268451  |
| C  | -5.364931 | -1.387503 | 1.730725  |

|   |           |           |           |
|---|-----------|-----------|-----------|
| C | -4.592785 | -0.085481 | 1.678413  |
| C | -6.725927 | -1.232447 | 2.386822  |
| C | -7.515163 | -2.529489 | 2.448431  |
| C | -3.230658 | -0.171521 | 1.032630  |
| C | -8.875150 | -2.367735 | 3.104335  |
| O | -2.812586 | -1.265669 | 0.611080  |
| O | -2.595877 | 0.932136  | 0.967624  |
| H | -9.422497 | -3.312582 | 3.136946  |
| H | -5.483955 | -1.779609 | 0.715820  |
| H | -5.152492 | 0.685032  | 1.137175  |
| H | -7.639458 | -2.922518 | 1.432788  |
| H | -7.311145 | -0.479308 | 1.843700  |
| H | -9.490691 | -1.645617 | 2.560422  |
| H | 3.475570  | 5.888131  | -0.937656 |
| H | 5.070865  | 7.799223  | -0.281702 |
| H | 4.430917  | 6.010465  | 1.368228  |
| H | 1.897586  | 3.957703  | -1.584901 |
| H | 2.856358  | 4.126031  | 0.741865  |
| C | 2.123537  | 4.857832  | 0.382466  |
| C | 1.288452  | 4.232419  | -0.720651 |
| C | 2.842817  | 6.116025  | -0.070231 |
| C | 3.695187  | 6.744466  | 1.019464  |
| C | 0.509560  | 3.021407  | -0.291221 |
| C | 4.407762  | 8.005415  | 0.563315  |
| O | 0.099665  | 2.912089  | 0.892786  |
| O | 0.253286  | 2.110490  | -1.132968 |
| H | 5.013414  | 8.437805  | 1.362944  |
| H | 1.476895  | 5.077302  | 1.236109  |
| H | 0.551231  | 4.957933  | -1.086583 |
| H | 3.061650  | 6.970157  | 1.884692  |
| H | 2.105793  | 6.849599  | -0.421129 |
| H | 3.691908  | 8.766443  | 0.240164  |

## D2. Zinc hexanoate catalyzed transition state

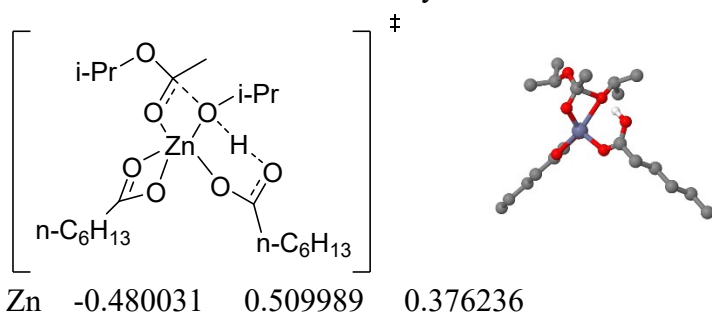

|   |           |           |           |
|---|-----------|-----------|-----------|
| C | 3.310096  | 1.690635  | 0.855084  |
| O | 0.838736  | 0.112288  | 1.735190  |
| C | 2.888911  | 0.539866  | -0.033417 |
| O | 2.741562  | -0.662854 | 0.738361  |
| C | 3.911132  | 0.233760  | -1.104083 |
| C | 1.563352  | -0.887529 | 1.372500  |
| C | 1.742195  | -2.018594 | 2.348103  |
| O | 0.539047  | -1.550877 | 0.144541  |
| C | 1.087502  | -2.360201 | -0.893892 |
| C | 0.619002  | -1.838052 | -2.236147 |
| C | 0.726652  | -3.821123 | -0.692995 |
| H | 3.432590  | 2.597117  | 0.257411  |
| H | 2.562735  | 1.876796  | 1.624527  |
| H | 4.265907  | 1.463814  | 1.334387  |
| H | 2.320686  | -1.639023 | 3.192588  |
| H | 3.573751  | -0.576450 | -1.752408 |
| H | 4.080093  | 1.118160  | -1.721434 |
| H | 1.933447  | 0.771343  | -0.514623 |
| H | 0.772924  | -2.356331 | 2.709757  |
| H | 4.861635  | -0.057104 | -0.650645 |
| H | 2.286928  | -2.846874 | 1.896834  |
| H | 2.175163  | -2.251390 | -0.825774 |
| H | -0.467467 | -1.928506 | -2.323070 |
| H | -0.351505 | -3.975438 | -0.785759 |
| H | 1.072862  | -2.412171 | -3.047678 |
| H | 1.221399  | -4.436957 | -1.447381 |
| H | 0.873953  | -0.785472 | -2.362040 |
| H | 1.038652  | -4.174920 | 0.291375  |
| H | -0.623545 | -2.090373 | 0.751123  |
| H | -5.963038 | -3.662651 | 1.474882  |
| H | -8.216822 | -4.572428 | 0.624750  |
| H | -6.313243 | -4.122797 | -0.956870 |
| H | -3.717025 | -2.774371 | 2.305248  |
| H | -4.086231 | -3.232821 | -0.121341 |
| C | -4.612104 | -2.408186 | 0.371535  |
| C | -3.806082 | -1.954506 | 1.590141  |
| C | -6.017333 | -2.847356 | 0.743098  |
| C | -6.834782 | -3.299518 | -0.455518 |
| C | -2.438878 | -1.520874 | 1.171447  |
| C | -8.239687 | -3.736873 | -0.080318 |
| O | -1.536242 | -2.439789 | 1.169328  |
| O | -2.241675 | -0.351955 | 0.811510  |
| H | -8.807417 | -4.057071 | -0.956534 |

|   |           |           |           |
|---|-----------|-----------|-----------|
| H | -4.659877 | -1.586643 | -0.350547 |
| H | -4.302098 | -1.109356 | 2.070187  |
| H | -6.884480 | -2.483477 | -1.185264 |
| H | -6.535164 | -2.021485 | 1.245834  |
| H | -8.792250 | -2.921175 | 0.394050  |
| H | -0.210299 | 6.154371  | -2.856435 |
| H | -0.643151 | 8.666734  | -3.209567 |
| H | -0.770421 | 7.630832  | -0.920076 |
| H | 0.222616  | 3.658375  | -2.509836 |
| H | -0.344219 | 5.150821  | -0.557864 |
| C | -1.086836 | 4.920106  | -1.327956 |
| C | -0.735709 | 3.599259  | -1.982937 |
| C | -1.167303 | 6.061237  | -2.326924 |
| C | -1.516386 | 7.394701  | -1.687509 |
| C | -0.650931 | 2.428548  | -1.046764 |
| C | -1.596466 | 8.531878  | -2.690668 |
| O | -0.920098 | 2.546754  | 0.174272  |
| O | -0.299024 | 1.298059  | -1.508154 |
| H | -1.848194 | 9.478653  | -2.207475 |
| H | -2.038867 | 4.818542  | -0.798626 |
| H | -1.468576 | 3.334009  | -2.753222 |
| H | -2.471934 | 7.299913  | -1.159226 |
| H | -1.913269 | 5.823289  | -3.096195 |
| H | -2.357987 | 8.333591  | -3.450275 |

### D3. Zinc hexanoate catalyzed tetrahedral intermediate

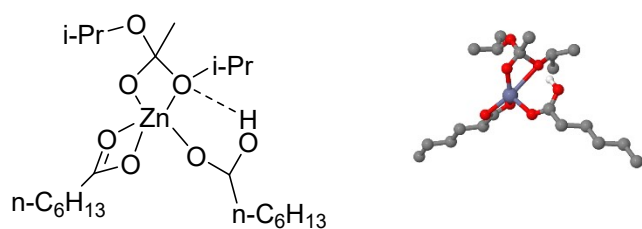

|    |           |           |           |
|----|-----------|-----------|-----------|
| Zn | -0.741880 | 0.849220  | 0.419526  |
| C  | 2.868909  | 1.852877  | 0.981562  |
| O  | 0.423504  | 0.118767  | 1.715795  |
| C  | 2.581199  | 0.687954  | 0.056132  |
| O  | 2.440076  | -0.524230 | 0.799187  |
| C  | 3.702515  | 0.460905  | -0.934551 |
| C  | 1.176783  | -0.866476 | 1.261130  |
| C  | 1.375311  | -1.994793 | 2.249754  |
| O  | 0.380784  | -1.398109 | 0.069163  |

|   |           |           |           |
|---|-----------|-----------|-----------|
| C | 1.014824  | -2.238881 | -0.905102 |
| C | 0.692530  | -1.685484 | -2.276635 |
| C | 0.564929  | -3.678813 | -0.747918 |
| H | 2.965417  | 2.777574  | 0.406604  |
| H | 2.068337  | 1.972060  | 1.709776  |
| H | 3.806444  | 1.680942  | 1.516789  |
| H | 1.866785  | -1.587187 | 3.132938  |
| H | 3.467356  | -0.357030 | -1.617928 |
| H | 3.873181  | 1.363368  | -1.525320 |
| H | 1.658880  | 0.879940  | -0.504012 |
| H | 0.408746  | -2.405742 | 2.540260  |
| H | 4.627031  | 0.214304  | -0.406849 |
| H | 2.004478  | -2.781008 | 1.831468  |
| H | 2.090182  | -2.168423 | -0.724298 |
| H | -0.382941 | -1.737144 | -2.466615 |
| H | -0.505573 | -3.778570 | -0.945082 |
| H | 1.203026  | -2.263739 | -3.050250 |
| H | 1.098129  | -4.314602 | -1.458223 |
| H | 0.993151  | -0.640622 | -2.359398 |
| H | 0.765102  | -4.051445 | 0.257745  |
| H | -0.985743 | -1.857862 | 0.533567  |
| H | -6.104057 | -3.497894 | 1.905211  |
| H | -8.027226 | -5.173136 | 1.559225  |
| H | -5.874147 | -5.379156 | 0.275138  |
| H | -4.194193 | -1.857469 | 2.249240  |
| H | -3.965858 | -3.732617 | 0.627833  |
| C | -4.658981 | -2.911012 | 0.428537  |
| C | -4.190339 | -1.665602 | 1.169308  |
| C | -6.068667 | -3.314278 | 0.824029  |
| C | -6.563686 | -4.548127 | 0.088026  |
| C | -2.800348 | -1.236769 | 0.821815  |
| C | -7.971627 | -4.950482 | 0.490041  |
| O | -1.921868 | -2.187360 | 0.804666  |
| O | -2.546207 | -0.054410 | 0.579440  |
| H | -8.305303 | -5.838023 | -0.051775 |
| H | -4.620213 | -2.726854 | -0.650943 |
| H | -4.852647 | -0.817775 | 0.990417  |
| H | -6.527122 | -4.361548 | -0.991354 |
| H | -6.755750 | -2.480017 | 0.636337  |
| H | -8.684521 | -4.147331 | 0.283762  |
| H | -0.082247 | 6.240378  | -3.157869 |
| H | 0.064527  | 8.787737  | -3.494250 |
| H | 0.530710  | 7.738708  | -1.255348 |

|   |           |          |           |
|---|-----------|----------|-----------|
| H | -0.207146 | 3.696081 | -2.818174 |
| H | 0.381847  | 5.231795 | -0.904385 |
| C | -0.625320 | 5.232515 | -1.335811 |
| C | -0.892373 | 3.888641 | -1.989354 |
| C | -0.762079 | 6.389935 | -2.309326 |
| C | -0.481445 | 7.742318 | -1.675907 |
| C | -0.826082 | 2.719398 | -1.051425 |
| C | -0.625333 | 8.896324 | -2.652489 |
| O | -1.086756 | 2.862502 | 0.174666  |
| O | -0.523872 | 1.573158 | -1.497784 |
| H | -0.417877 | 9.856523 | -2.174802 |
| H | -1.311518 | 5.363004 | -0.494777 |
| H | -1.900735 | 3.875802 | -2.422058 |
| H | -1.159709 | 7.888945 | -0.827674 |
| H | -1.774856 | 6.392007 | -2.732506 |
| H | -1.638434 | 8.940847 | -3.062194 |

### Stress relaxation time fitting

Figure S3 shows the stress relaxation tests. The stress relaxation fittings were conducted according to our previous work and others,<sup>2,3</sup> and the fitting parameters are presented in Table S2-S5.<sup>3</sup> The Kohlrausch-Williams-Watts (KWW) stretched exponential decay is given below (1):

$$\frac{\sigma(t)}{\sigma_0} = \left[ A_{net} \exp\left\{ - \left( t / \tau_{net} \right)^{\beta_{net}} \right\} + A_{ex} \exp\left\{ - \left( t / \tau_{ex} \right)^{\beta_{ex}} \right\} \right] \quad (1)$$

where  $\sigma(t)/\sigma_0$  is the normalized stress at time  $t$ ,  $\tau$  is the characteristic relaxation time,  $A$  is the contribution of two relaxation components such that  $A_{net} + A_{ex} = 1$ , and  $\beta$  is the exponent which controls the shape of the stretched exponential decay.<sup>2,4,5</sup>



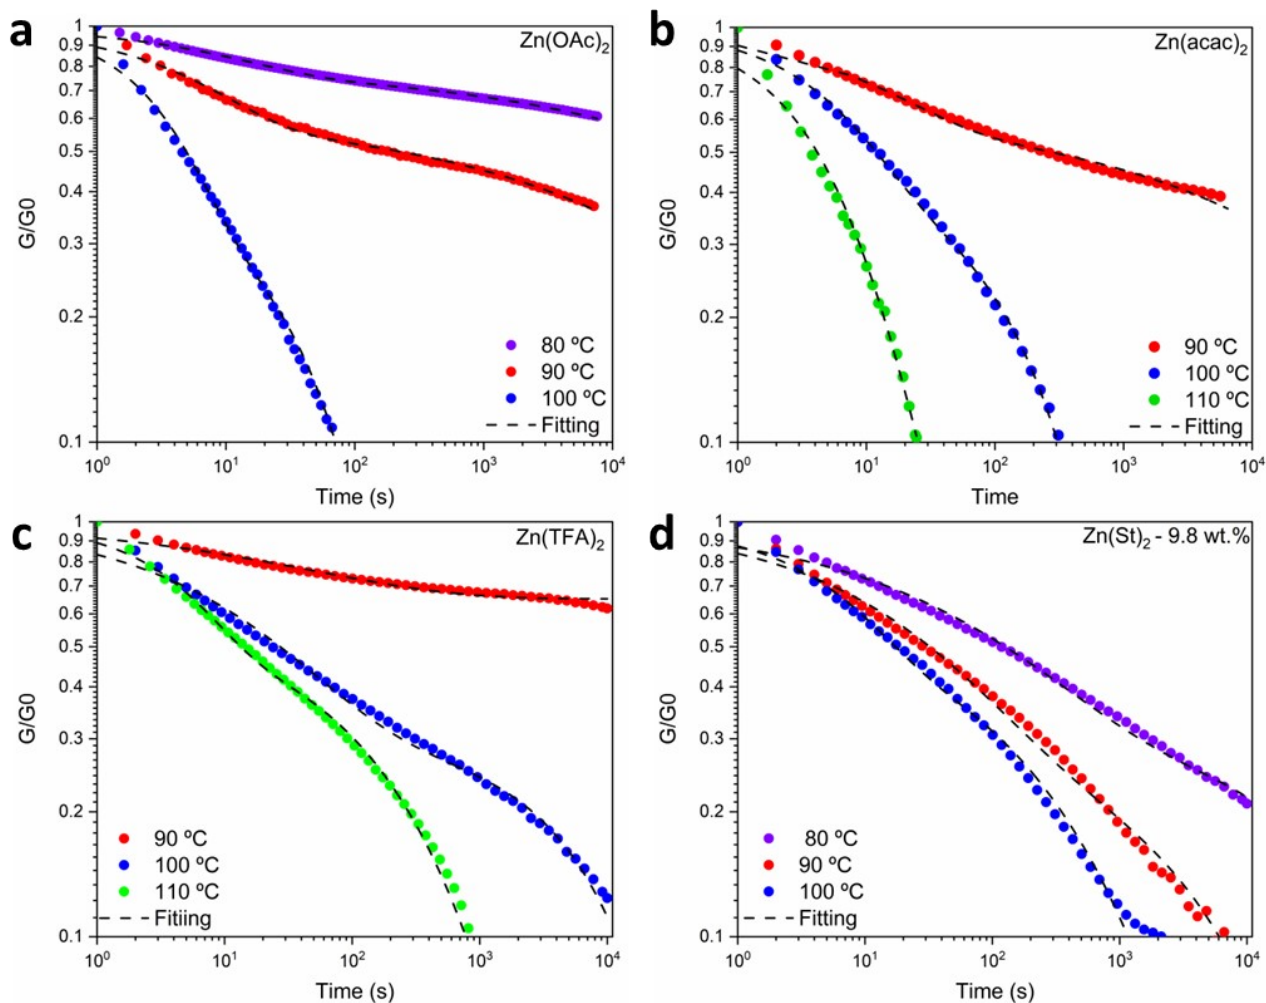

Figure S3 Stress relaxation curves of vitrimerized EVA with a)  $\text{Zn}(\text{OAc})_2$ , b)  $\text{Zn}(\text{acac})_2$ , c)  $\text{Zn}(\text{TFA})_2$ , and d)  $\text{Zn}(\text{St})_2 - 9.8 \text{ wt.}\%$ .

Table S3. Parameters obtained from fitting stress relaxation curves to experimental data for vitrimerized EVA with zinc trifluoroacetate using equation 1.

| T (°C) | $\tau_{\text{net}}$ (seconds) | $\tau_{\text{ex}}$ (seconds) | $\beta_{\text{net}}$ | $\beta_{\text{ex}}$ | $A_{\text{net}}$ | $A_{\text{ex}}$ | R <sup>2</sup> |
|--------|-------------------------------|------------------------------|----------------------|---------------------|------------------|-----------------|----------------|
| 90     | 4.64E28±0.00                  | 33.67±0.11                   | 1.00±0.00            | 0.35±0.00           | 0.65±0.00        | 0.35±0.00       | 0.97           |
| 100    | 1.03E4±6.06E1                 | 17.70±0.11                   | 0.67±0.01            | 0.46±0.00           | 0.30±0.00        | 0.70±0.00       | 0.99           |
| 110    | 2.38E2±1.69                   | 5.79±0.10                    | 0.48±0.00            | 0.96±0.00           | 0.59±0.00        | 0.41±0.00       | 1.00           |

Table S4. Parameters obtained from fitting stress relaxation curves to experimental data for vitrimerized EVA with zinc acetylacetonate using equation 1.

| temperature (°C) | $\tau_{\text{net}}$ (seconds) | $\tau_{\text{ex}}$ (seconds) | $\beta_{\text{net}}$ | $\beta_{\text{ex}}$ | $A_{\text{net}}$ | $A_{\text{ex}}$ | R <sup>2</sup> |
|------------------|-------------------------------|------------------------------|----------------------|---------------------|------------------|-----------------|----------------|
| 90               | 6.01E4±4.95E2                 | 14.35±0.07                   | 0.26±0.00            | 0.64±0.00           | 0.64±0.00        | 0.36±0.00       | 0.99           |

|     |               |           |           |           |           |           |      |
|-----|---------------|-----------|-----------|-----------|-----------|-----------|------|
| 100 | 1.64E2±1.66E0 | 6.97±0.02 | 0.66±0.00 | 0.80±0.00 | 0.46±0.00 | 0.54±0.00 | 1.00 |
| 110 | 2.88E1±1.25E2 | 4.87±2.37 | 0.93±3.08 | 0.81±0.02 | 0.20±0.90 | 0.80±0.90 | 0.97 |

Table S5. Parameters obtained from fitting stress relaxation curves to experimental data for vitrimerized EVA with zinc acetate using equation 1.

| T (°C) | $\tau_{net}$ (seconds) | $\tau_{ex}$ (seconds) | $\beta_{net}$ | $\beta_{ex}$ | $A_{net}$ | $A_{ex}$  | $R^2$ |
|--------|------------------------|-----------------------|---------------|--------------|-----------|-----------|-------|
| 80     | 8.06E5±2.09E4          | 12.44±0.03            | 0.27±0.00     | 0.65±0.00    | 0.80±0.00 | 0.20±0.00 | 0.99  |
| 90     | 7.53E4±6.05E2          | 7.62±0.02             | 0.26±0.00     | 0.73±0.00    | 0.62±0.00 | 0.38±0.00 | 0.99  |
| 100    | 4.60E1±0.76            | 3.94±0.01             | 0.74±0.01     | 1.00±0.00    | 0.40±0.00 | 0.60±0.00 | 0.99  |

Table S6. Parameters obtained from fitting stress relaxation curves to experimental data for vitrimerized EVA with zinc stearate using equation 1.

| T (°C) | $\tau_{net}$ (seconds) | $\tau_{ex}$ (seconds) | $\beta_{net}$ | $\beta_{ex}$ | $A_{net}$ | $A_{ex}$  | $R^2$ |
|--------|------------------------|-----------------------|---------------|--------------|-----------|-----------|-------|
| 80     | 5.94E4±8.41E3          | 96.19±1.95            | 1.00±0.11     | 0.36±0.00    | 0.25±0.01 | 0.75±0.00 | 0.99  |
| 90     | 5.07E3±2.44E2          | 24.71±0.38            | 0.48±0.01     | 0.43±0.00    | 0.30±0.01 | 0.70±0.01 | 0.99  |
| 100    | 2.43E2±0.00            | 8.21±0.03             | 0.39±0.00     | 0.84±0.01    | 0.63±0.00 | 0.37±0.00 | 0.99  |

Figure S4 shows the Arrhenius plot of measured average relaxation times using equation (2) and (3):<sup>2,3</sup>

$$\langle \tau \rangle = \frac{\tau_{ex} \Gamma\left(\frac{1}{\beta_{ex}}\right)}{\beta_{ex}} \quad (2)$$

$$\tau^*(T) = \tau_0^*(T) \exp\left(-\frac{E_{ex}}{RT}\right) \quad (3)$$

where  $\langle \tau \rangle$  is the average characteristic relaxation time and  $\tau^*(T)$  corresponds to  $\langle \tau \rangle$  at the test temperature,  $E_{ex}$  is the flow activation energy of exchange reaction, R is the universal gas constant, and T is the absolute temperature.

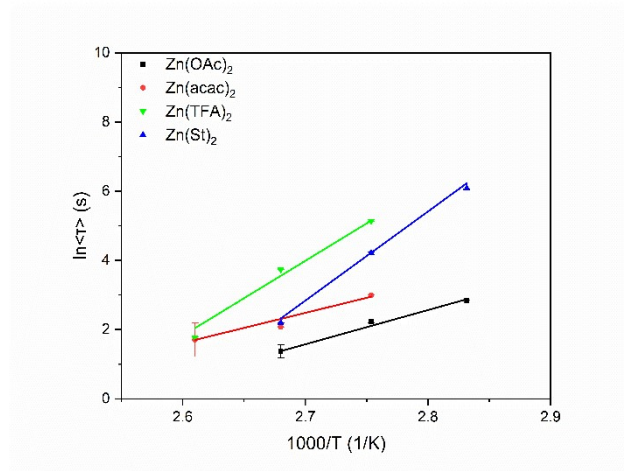

Figure S4 Arrhenius plot of the measured average relaxation times for  $\text{Zn}(\text{OAc})_2$ ,  $\text{Zn}(\text{acac})_2$ ,  $\text{Zn}(\text{TFA})_2$  and  $\text{Zn}(\text{St})_2 - 9.8 \text{ wt.}\%$ .

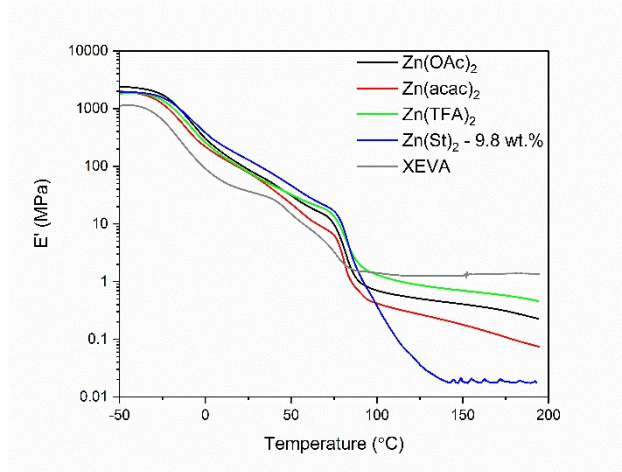

Figure S5. DMA of vitrimerized samples with  $\text{Zn}(\text{OAc})_2$ ,  $\text{Zn}(\text{acac})_2$ ,  $\text{Zn}(\text{TFA})_2$  and  $\text{Zn}(\text{St})_2 - 9.8 \text{ wt.}\%$  compared with initial crosslinked EVA.

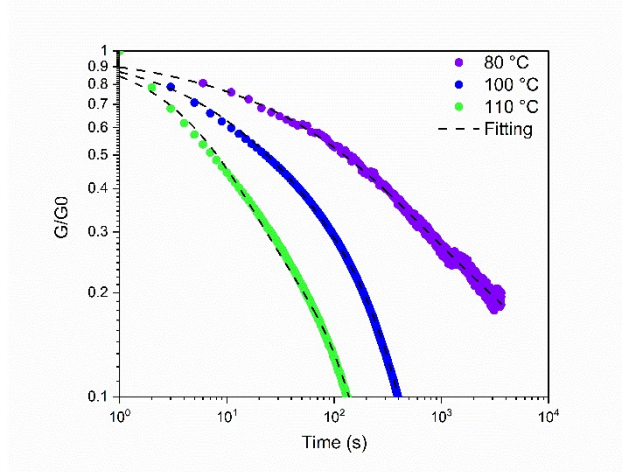

Figure S6 Stress relaxation of  $\text{Zn}(\text{St})_2 - 3.1 \text{ wt.}\%$  at different temperatures.

Table S7. Parameters obtained from fitting stress relaxation curves to experimental data for vitrimerized EVA with  $\text{Zn}(\text{St})_2 - 3.1 \text{ wt.}\%$  using equation 1.

| T (°C) | $\tau_{\text{net}}$ (seconds)     | $\tau_{\text{ex}}$ (seconds) | $\beta_{\text{net}}$ | $\beta_{\text{ex}}$ | $A_{\text{net}}$ | $A_{\text{ex}}$ | $R^2$ |
|--------|-----------------------------------|------------------------------|----------------------|---------------------|------------------|-----------------|-------|
| 80     | $1.15\text{E}4 \pm 2.05\text{E}4$ | $98.08 \pm 7.49$             | $0.35 \pm 0.11$      | $0.42 \pm 0.03$     | $0.35 \pm 0.22$  | $0.65 \pm 0.22$ | 0.99  |
| 100    | $2.63\text{E}2 \pm 1.99\text{E}1$ | $12.25 \pm 1.15$             | $0.85 \pm 0.04$      | $0.56 \pm 0.01$     | $0.41 \pm 0.03$  | $0.59 \pm 0.03$ | 0.99  |
| 110    | $1.31\text{E}2 \pm 9.50\text{E}0$ | $6.91 \pm 0.31$              | $0.99 \pm 0.06$      | $0.74 \pm 0.02$     | $0.28 \pm 0.02$  | $0.72 \pm 0.02$ | 0.99  |



## References

1. McLoughlin KM, Oskouei AJ, Sing MK, Bandegi A, Mitchell S, Kennedy J, et al. Thermomechanical Properties of Cross-Linked EVA: A Holistic Approach. *ACS Applied Polymer Materials*. 2023 Jan 30;5(2):1430–9.
2. Li L, Chen X, Jin K, Torkelson JM. Vitrimers Designed Both To Strongly Suppress Creep and To Recover Original Cross-Link Density after Reprocessing: Quantitative Theory and Experiments. *Macromolecules*. 2018 Aug 14;51(15):5537–46.
3. Bandegi A, Gray TG, Mitchell S, Jamei Oskouei A, Sing MK, Kennedy J, et al. Vitrimerization of crosslinked elastomers: a mechanochemical approach for recycling thermoset polymers. *Mater Adv*. 2023;4(12):2648–58.
4. Fancey KS. A mechanical model for creep, recovery and stress relaxation in polymeric materials. *J Mater Sci*. 2005 Sep 1;40(18):4827–31.
5. John D. Ferry. *VISCOELASTIC PROPERTIES OF POLYMERS*. Third. University of Wisconsin: JOHN WILEY & SONS; 1980. 641 p.
