# Supplementary figures and images for: Vitrimerization of crosslinked poly(ethylene-vinyl acetate): the effect of catalysts
Source: Royal Society of Chemistry journal article supplement (doi:10.1039/d4lp00112e), 2024-01-01

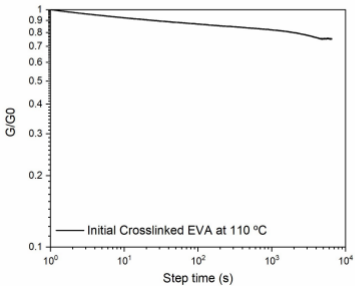

Supplement: d4lp00112e1.pdf [file d4lp00112e1.pdf]

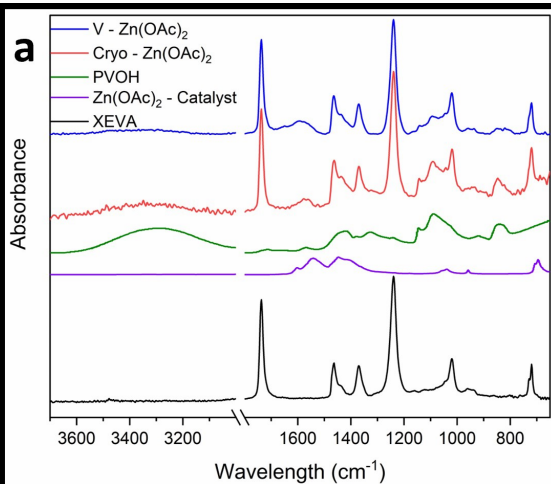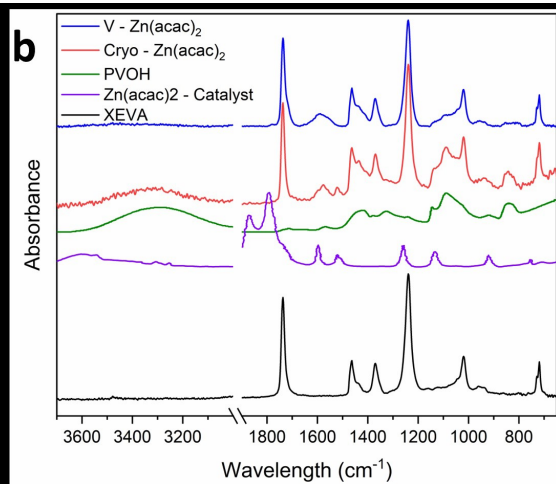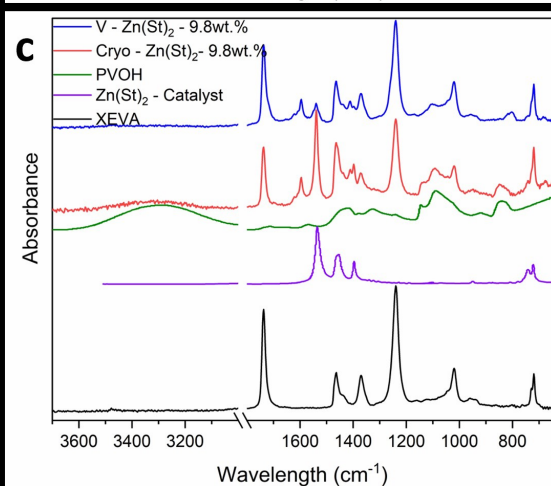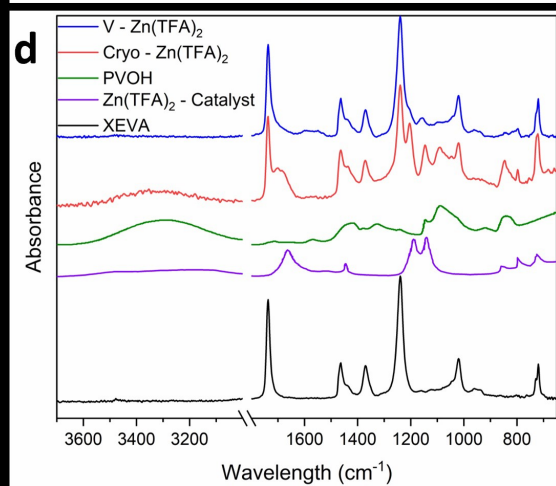

Supplement: d4lp00112e2.pdf [file d4lp00112e2.pdf]

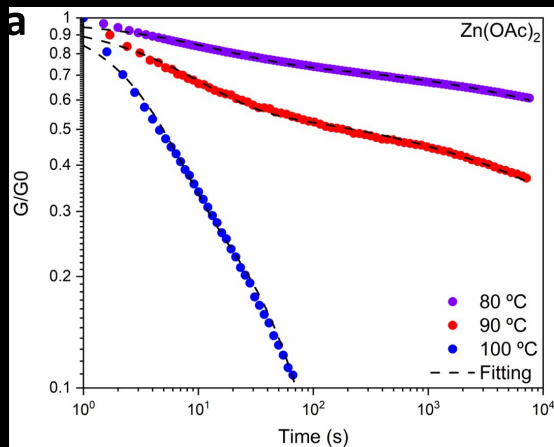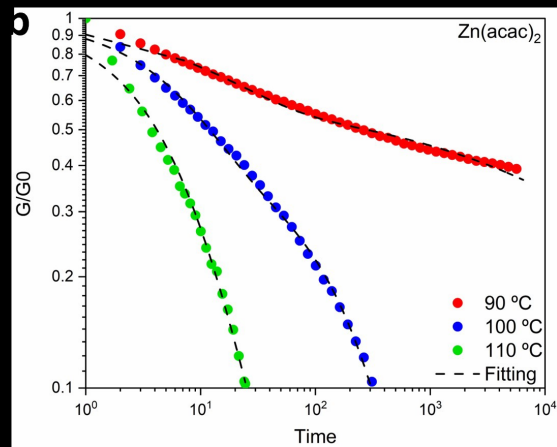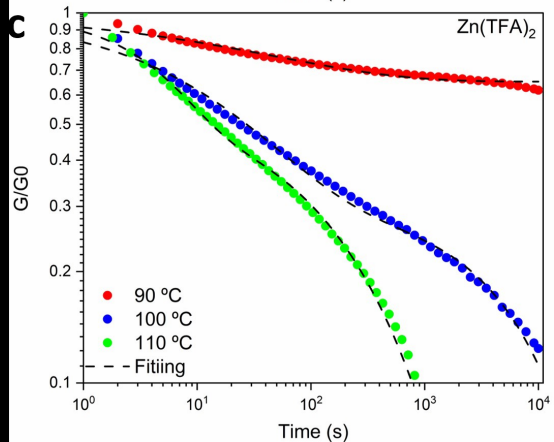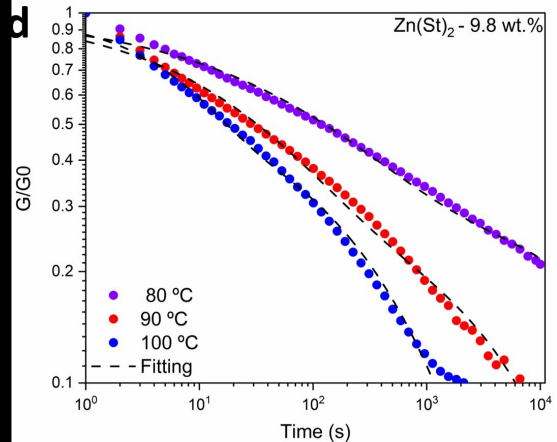

Supplement: d4lp00112e3.pdf [file d4lp00112e3.pdf]

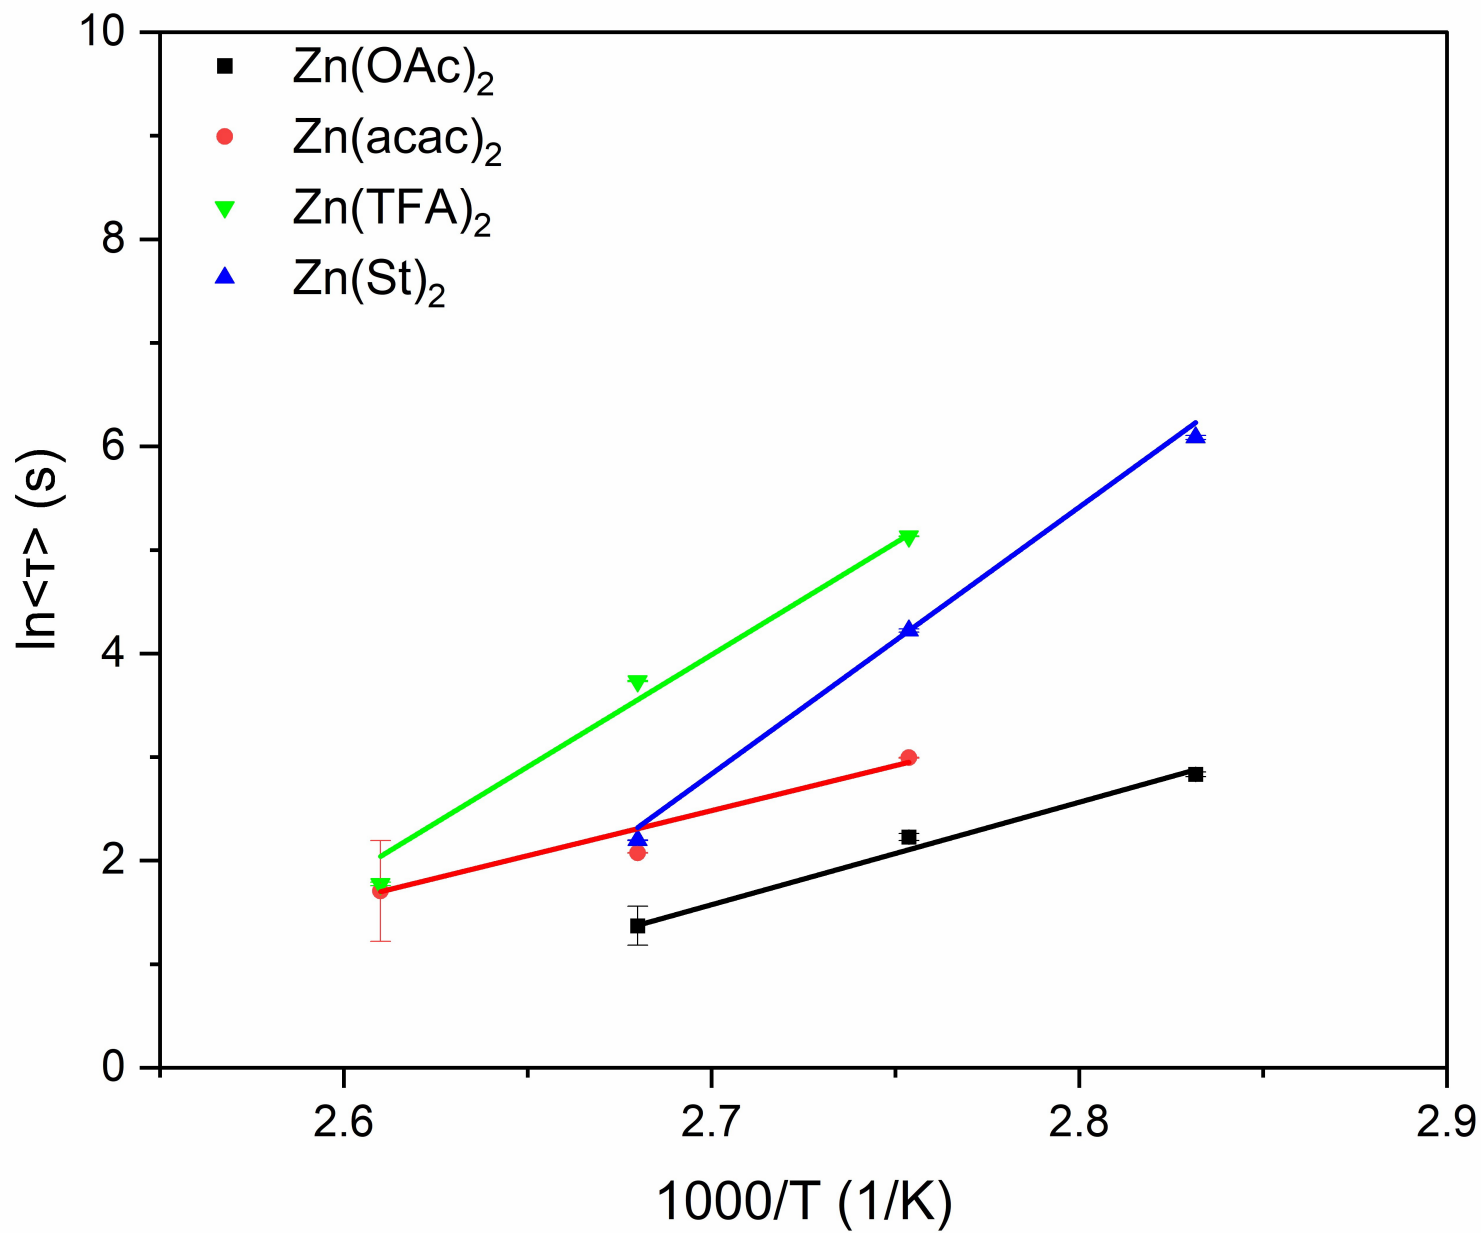

Supplement: d4lp00112e4.pdf [file d4lp00112e4.pdf]

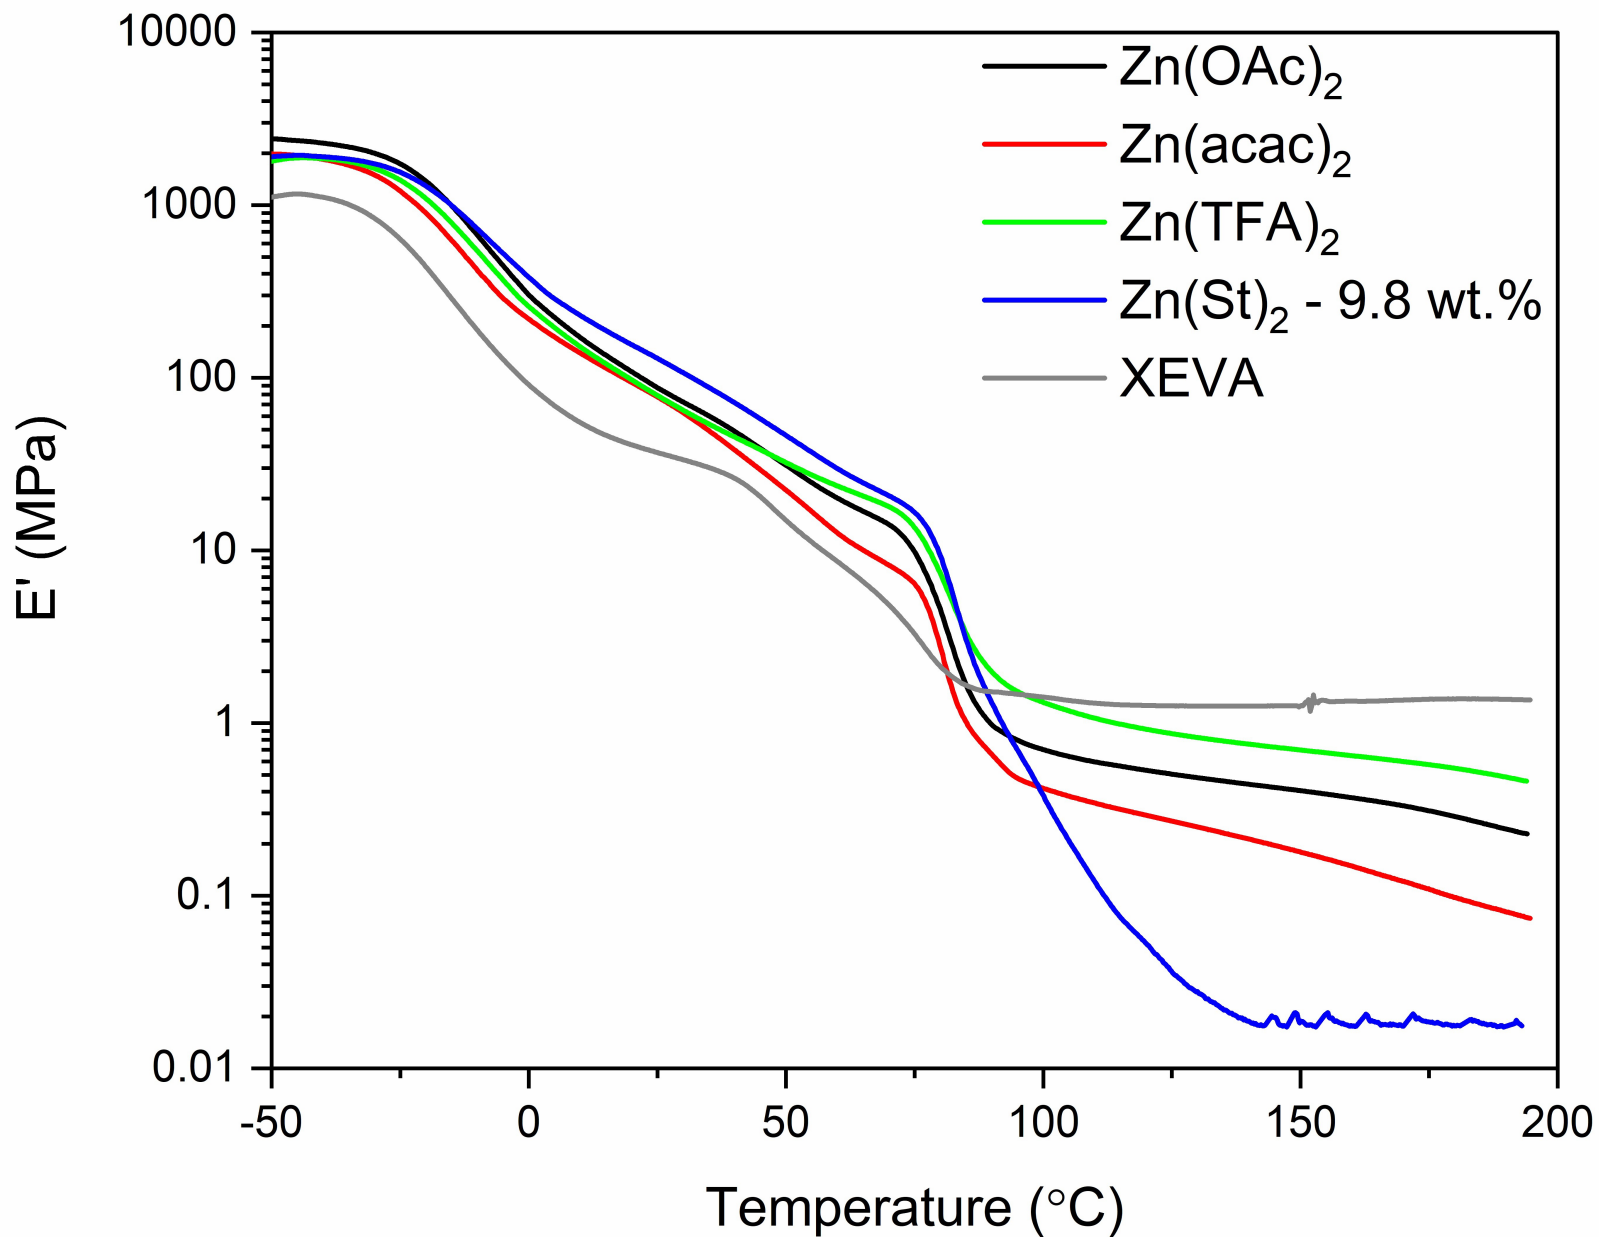

Supplement: d4lp00112e5.pdf [file d4lp00112e5.pdf]

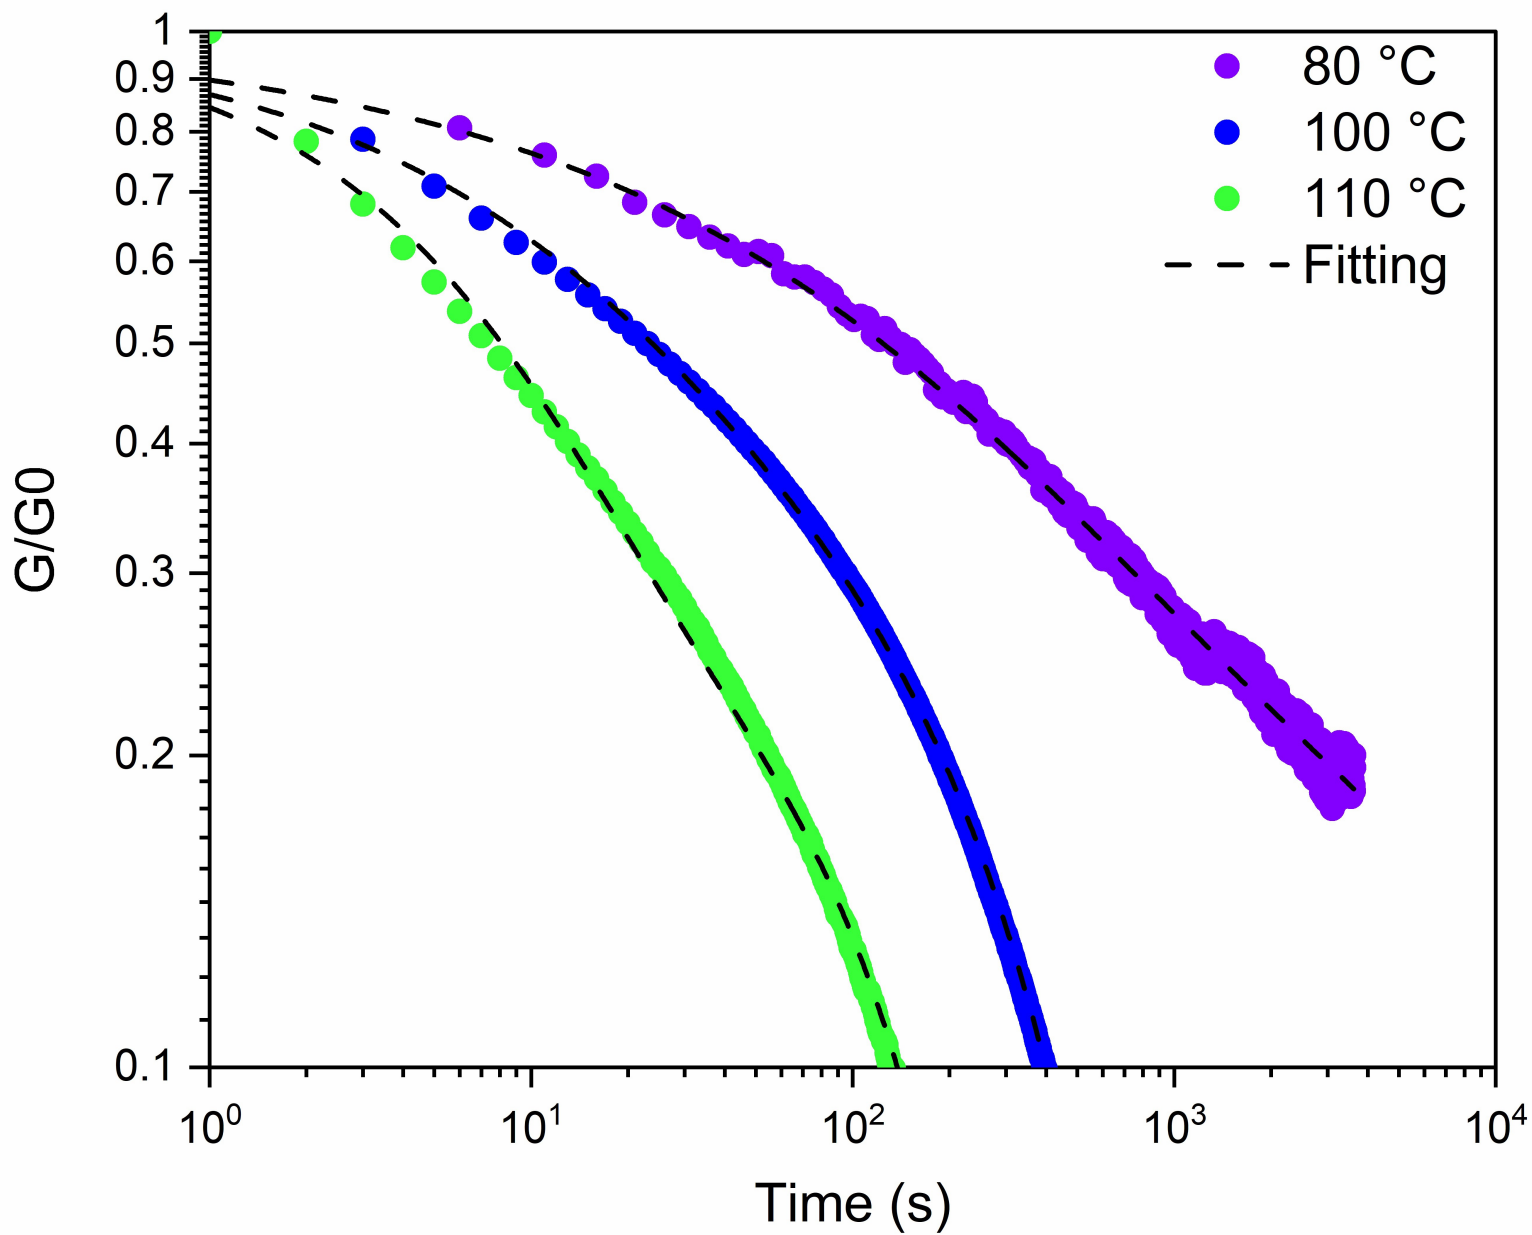

Supplement: d4lp00112e6.pdf [file d4lp00112e6.pdf]

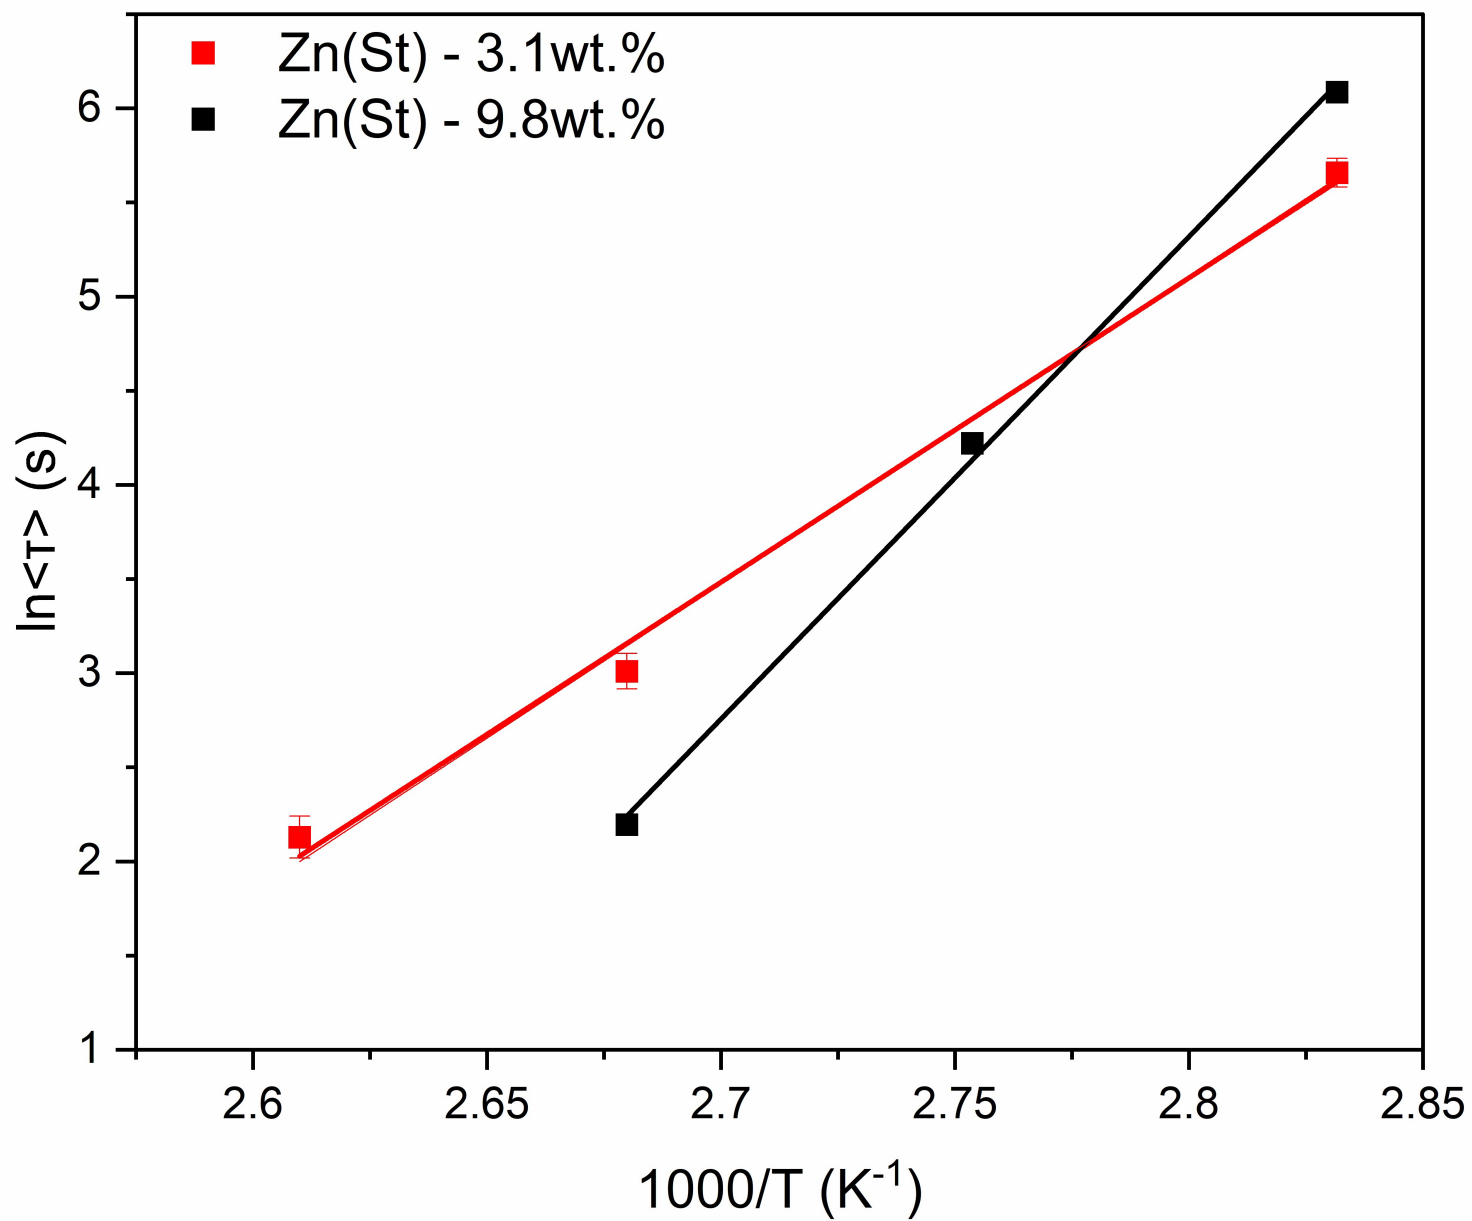

Supplement: d4lp00112e7.pdf [file d4lp00112e7.pdf]
